# Supplementary material for: An Earth-sized exoplanet with a Mercury-like composition
Source: Springer Nature journal article supplement (doi:10.1038/s41550-018-0420-5), 2018-03-26
Supplement: 41550_2018_420_MOESM1_ESM.pdf [file 41550_2018_420_MOESM1_ESM.pdf]

In the format provided by the authors and unedited.

# An Earth-sized exoplanet with a Mercury-like composition

A. Santerne<sup>1</sup><sup>\*</sup>, B. Brugger<sup>1</sup>, D. J. Armstrong<sup>2</sup>, V. Adibekyan<sup>3</sup>, J. Lillo-Box<sup>4</sup>, H. Gosselin<sup>1,5</sup>, A. Aguichine<sup>1,6</sup>, J.-M. Almenara<sup>7</sup>, D. Barrado<sup>8</sup>, S. C. C. Barros<sup>3</sup>, D. Bayliss<sup>7</sup>, I. Boisse<sup>1</sup>, A. S. Bonomo<sup>9</sup>, F. Bouchy<sup>7</sup>, D. J. A. Brown<sup>2</sup>, M. Deleuil<sup>1</sup>, E. Delgado Mena<sup>3</sup>, O. Demangeon<sup>3</sup>, R. F. Díaz<sup>7,10,11</sup>, A. Doyle<sup>2</sup>, X. Dumusque<sup>7</sup>, F. Faedi<sup>2,12</sup>, J. P. Faria<sup>3,13</sup>, P. Figueira<sup>3,4</sup>, E. Foxell<sup>2</sup>, H. Giles<sup>7</sup>, G. Hébrard<sup>14,15</sup>, S. Hojjatpanah<sup>3,13</sup>, M. Hobson<sup>1</sup>, J. Jackman<sup>2</sup>, G. King<sup>2</sup>, J. Kirk<sup>2</sup>, K. W. F. Lam<sup>2</sup>, R. Ligi<sup>1</sup>, C. Lovis<sup>7</sup>, T. Louden<sup>2</sup>, J. McCormac<sup>2</sup>, O. Mousis<sup>1</sup>, J. J. Neal<sup>3,13</sup>, H. P. Osborn<sup>1,2</sup>, F. Pepe<sup>7</sup>, D. Pollacco<sup>2</sup>, N. C. Santos<sup>3,13</sup>, S. G. Sousa<sup>3</sup>, S. Udry<sup>7</sup> and A. Vigan<sup>1</sup>

<sup>1</sup>Aix Marseille Univ., CNRS, LAM, Laboratoire d'Astrophysique de Marseille, Marseille, France. <sup>2</sup>Department of Physics, University of Warwick, Coventry, UK. <sup>3</sup>Instituto de Astrofísica e Ciências do Espaço, Universidade do Porto, CAUP, Porto, Portugal. <sup>4</sup>European Southern Observatory (ESO), Santiago de Chile, Chile. <sup>5</sup>Université de Toulouse, UPS-OMP, IRAP, Toulouse, France. <sup>6</sup>Paris-Saclay Université, ENS Cachan, Cachan, France. <sup>7</sup>Observatoire Astronomique de l'Université de Genève, Versoix, Switzerland. <sup>8</sup>Depto. de Astrofísica, Centro de Astrobiología (CSIC-INTA), Madrid, Spain. <sup>9</sup>INAF—Osservatorio Astrofisico di Torino, Pino Torinese, Italy. <sup>10</sup>Universidad de Buenos Aires, Facultad de Ciencias Exactas y Naturales, Buenos Aires, Argentina. <sup>11</sup>CONICET—Universidad de Buenos Aires, Instituto de Astronomía y Física del Espacio (IAFE), Buenos Aires, Argentina. <sup>12</sup>INAF—Osservatorio Astrofisico di Catania, Catania, Italy. <sup>13</sup>Departamento de Física e Astronomia, Faculdade de Ciências, Universidade do Porto, Porto, Portugal. <sup>14</sup>Institut d'Astrophysique de Paris, UMR7095 CNRS, Université Pierre & Marie Curie, Paris, France. <sup>15</sup>Aix Marseille Univ., CNRS, OHP, Observatoire de Haute Provence, Saint Michel l'Observatoire, France. \*e-mail: [alexandre.santerne@lam.fr](mailto:alexandre.santerne@lam.fr)

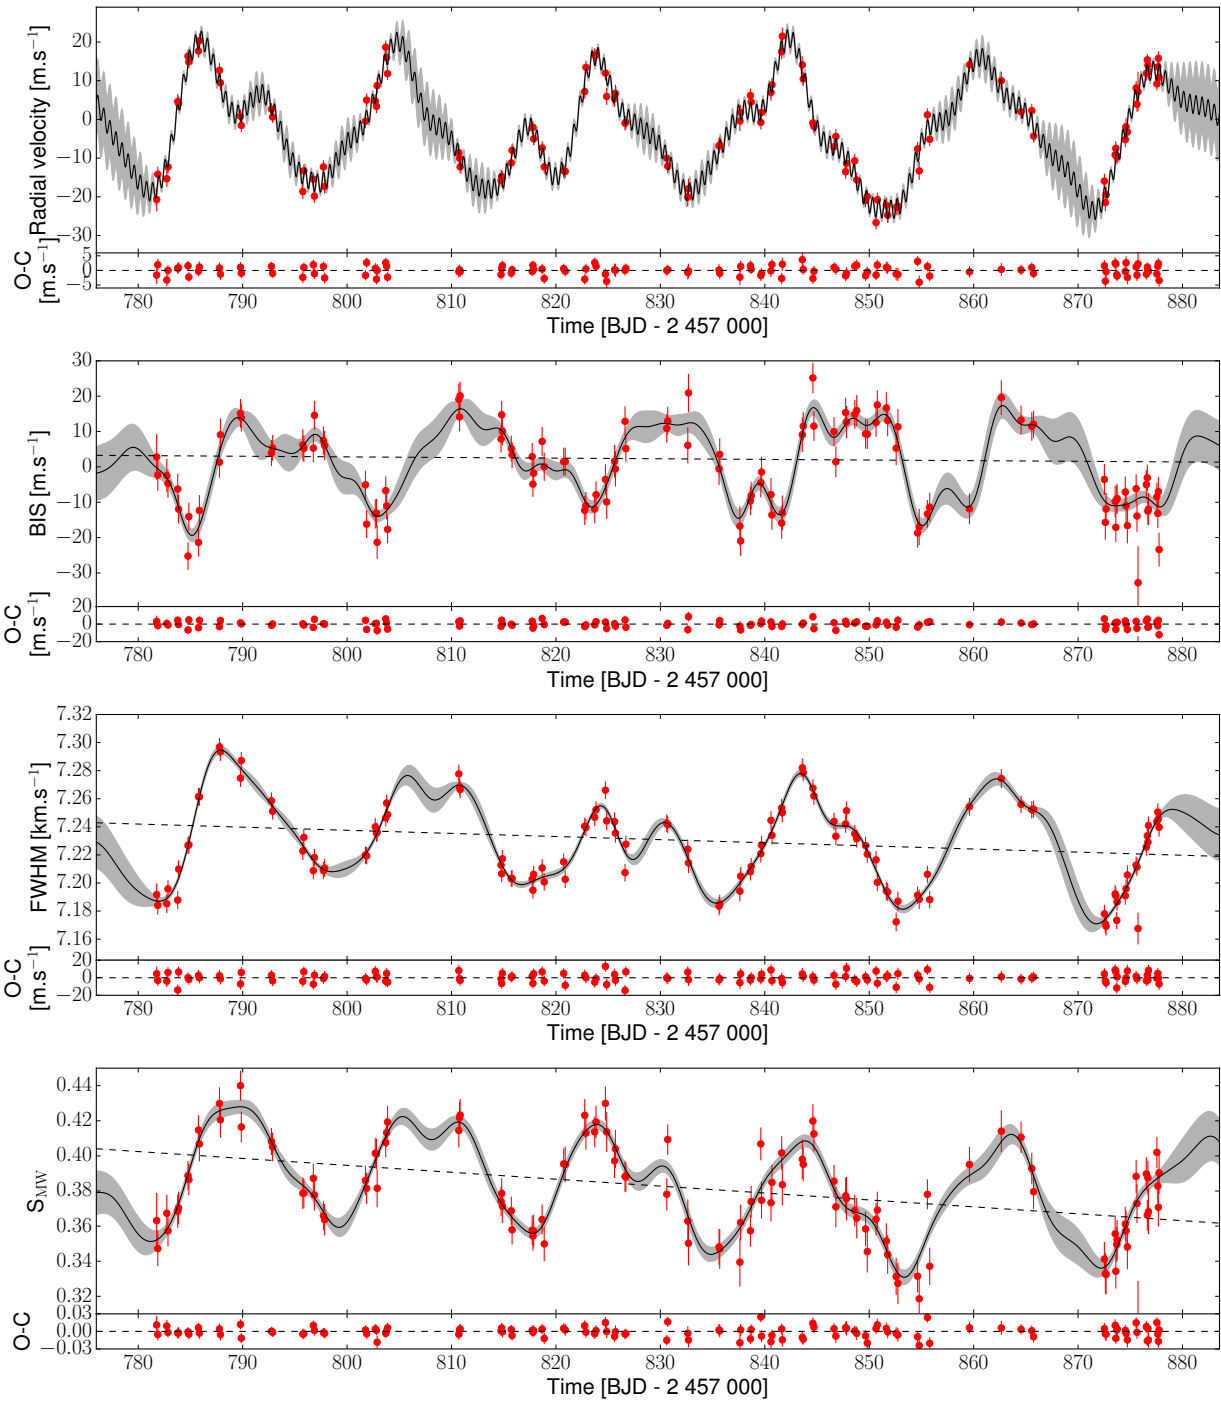

Continued on next page

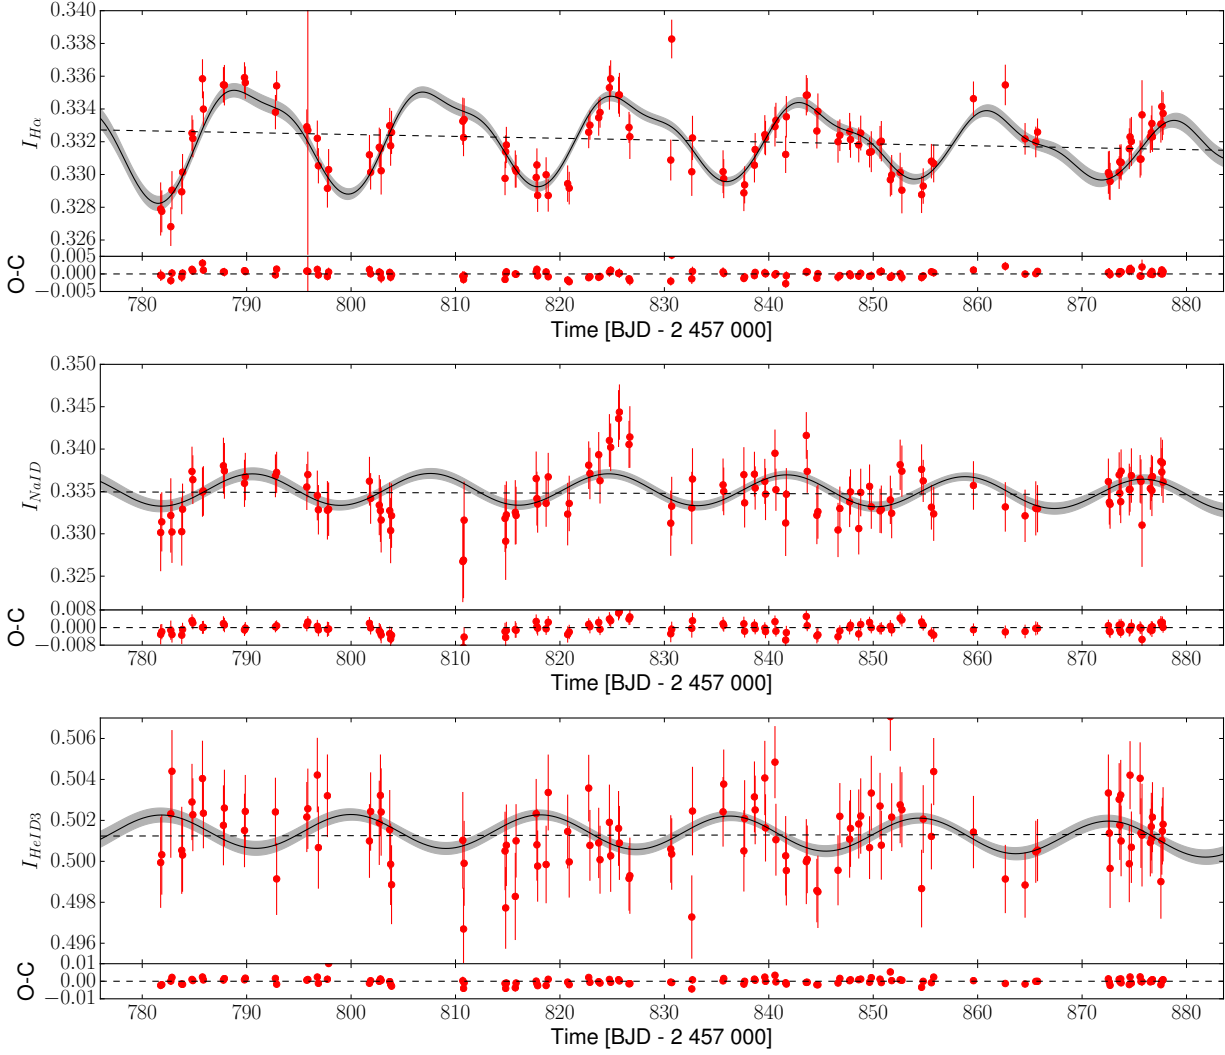

Supplementary Figure 1: **Radial velocity, spectroscopic diagnoses, and activity indices time series.** The best Gaussian-process regression (solid line) and 1- $\sigma$  uncertainty (grey area) are displayed. The dashed line represents a possible long-term drift in the data. The lower-panel of each plot shows the residual from the best GP regression. From top to bottom: radial velocity, bisector, FWHM,  $S_{MW}$ ,  $I_{H\alpha}$ ,  $I_{NaID}$ , and  $I_{HeID3}$ .

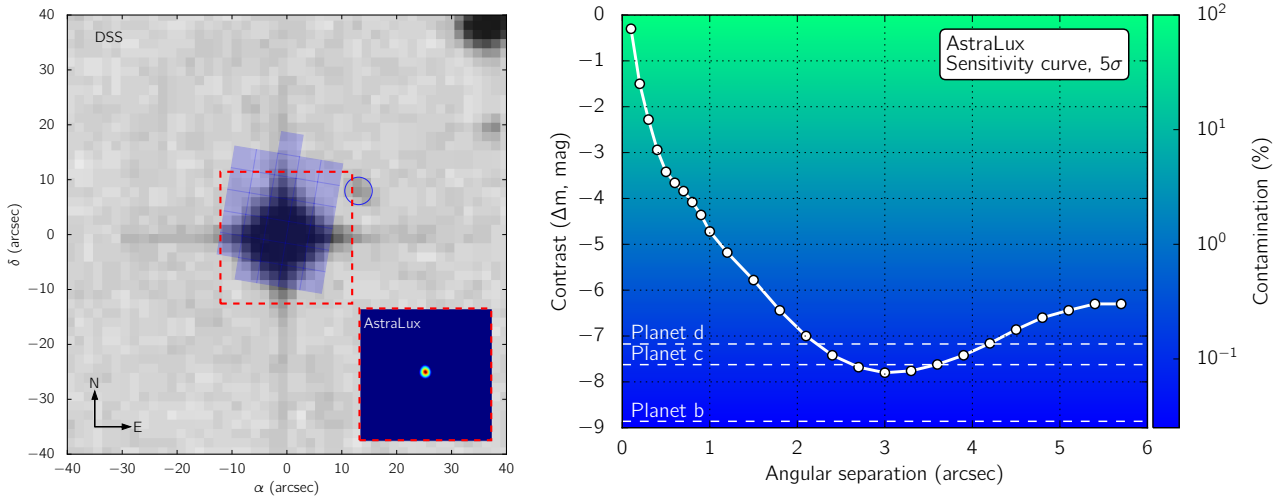

Supplementary Figure 2: **Results from the high-resolution imaging observations.** (left) 80''x80'' DSS image of the target K2-229 together with the *K2* photometric mask used by the K2SFF pipeline with pixels overlaid as blue squares. The red square shows the field-of view of the high-resolution AstraLux image in the SDSS *i'* band that is shown in the bottom-right of the figure (with an arbitrary offset for clarity). The circle indicates the position of a contaminating star 8 magnitudes fainter in the R band. (right) Sensitivity curve obtained with the AstraLux image. The color-code indicates the contamination that a source of a given contrast would introduce if lying within the aperture. The loss of sensitivity from 3'' is due to an over illumination of the left- and right-hand columns of the detector. The horizontal dashed lines represent the maximum magnitude contrast that an eclipsing binary would need to mimic the transit signals.

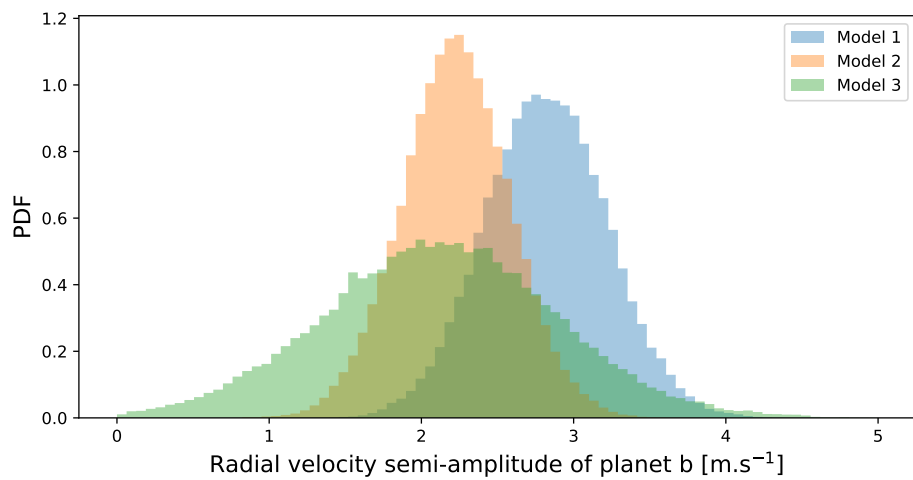

Supplementary Figure 3: **Comparison of the posterior distribution functions (PDF) for the radial velocity semi-amplitude of planet b.** The blue, orange, and green PDFs correspond to those derived with model 1, 2, and 3 (respectively).

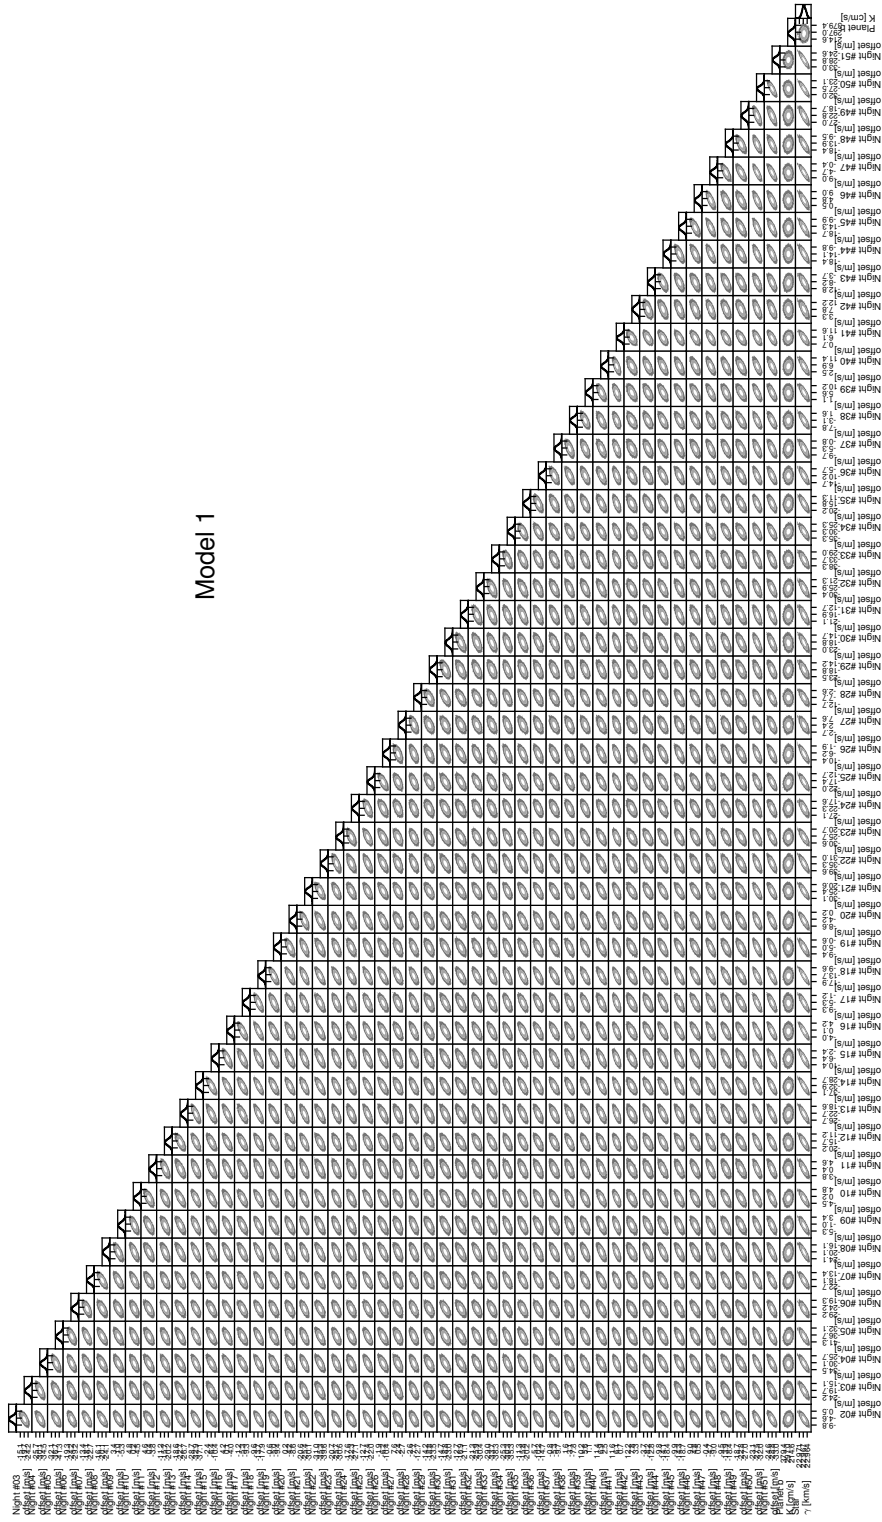

Supplementary Figure 4: Posterior distribution of the parameters from the Model 1.

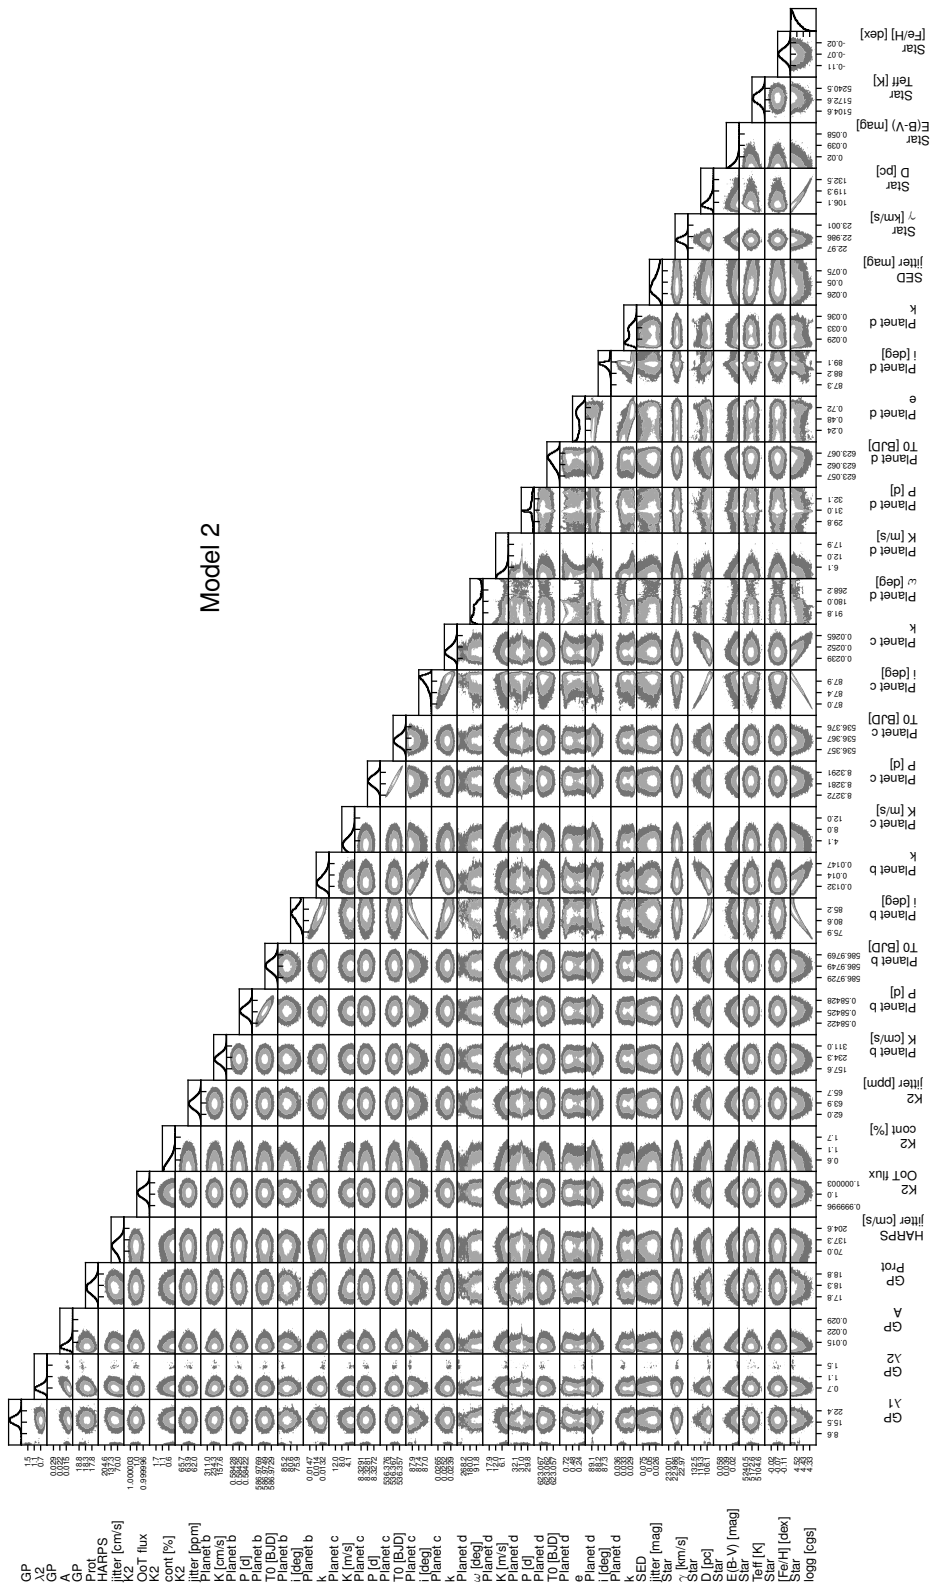

Supplementary Figure 5: Posterior distribution of the parameters from the Model 2.

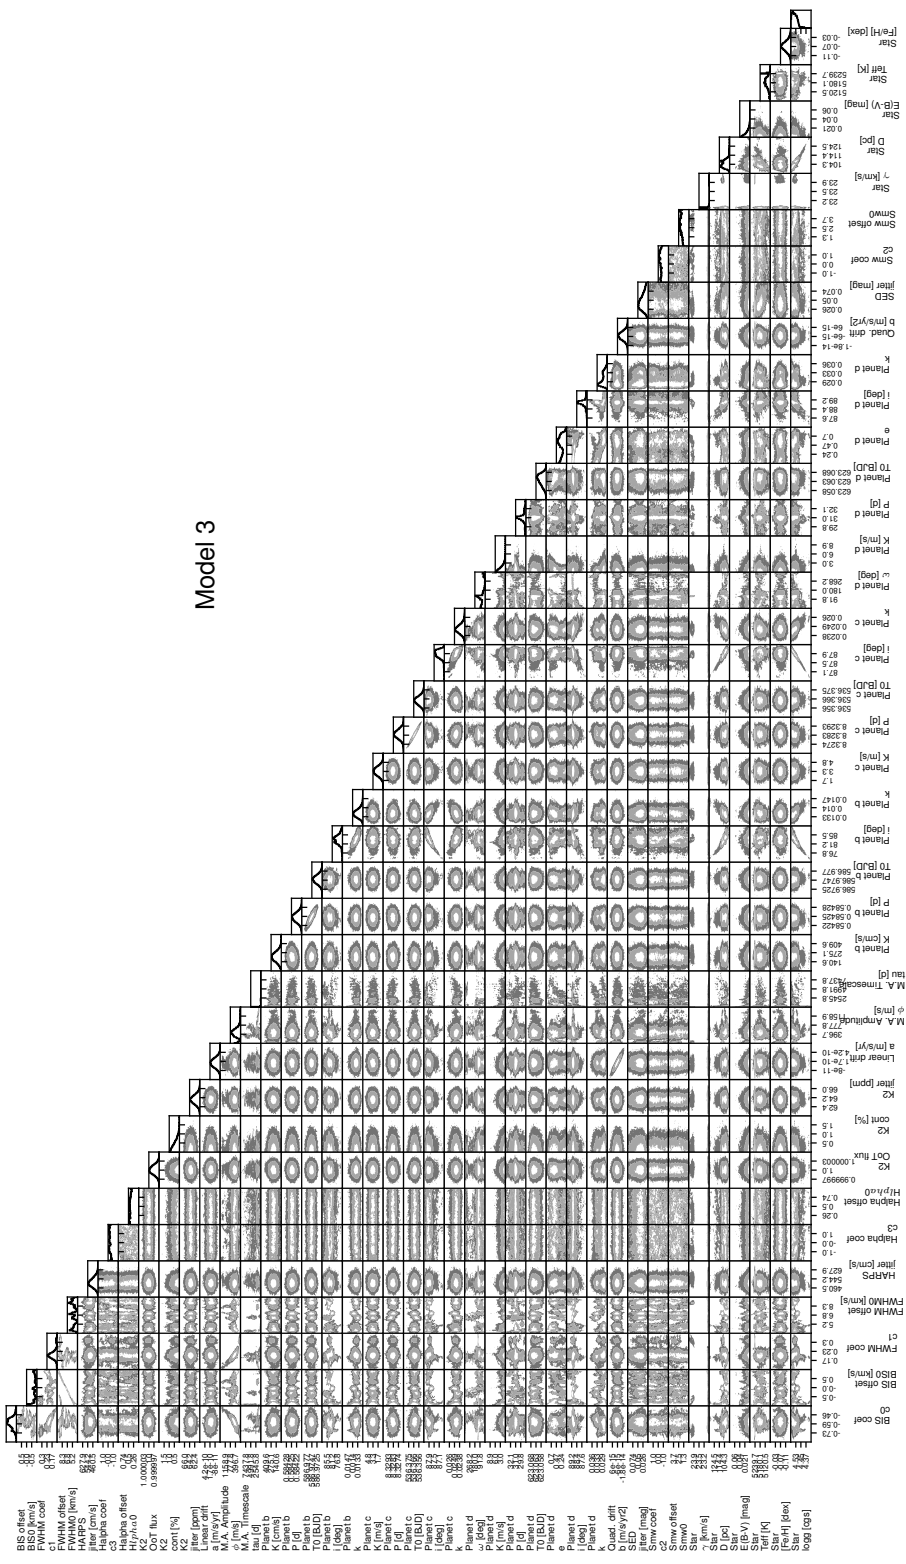

Supplementary Figure 6: Posterior distribution of the parameters from the Model 3.



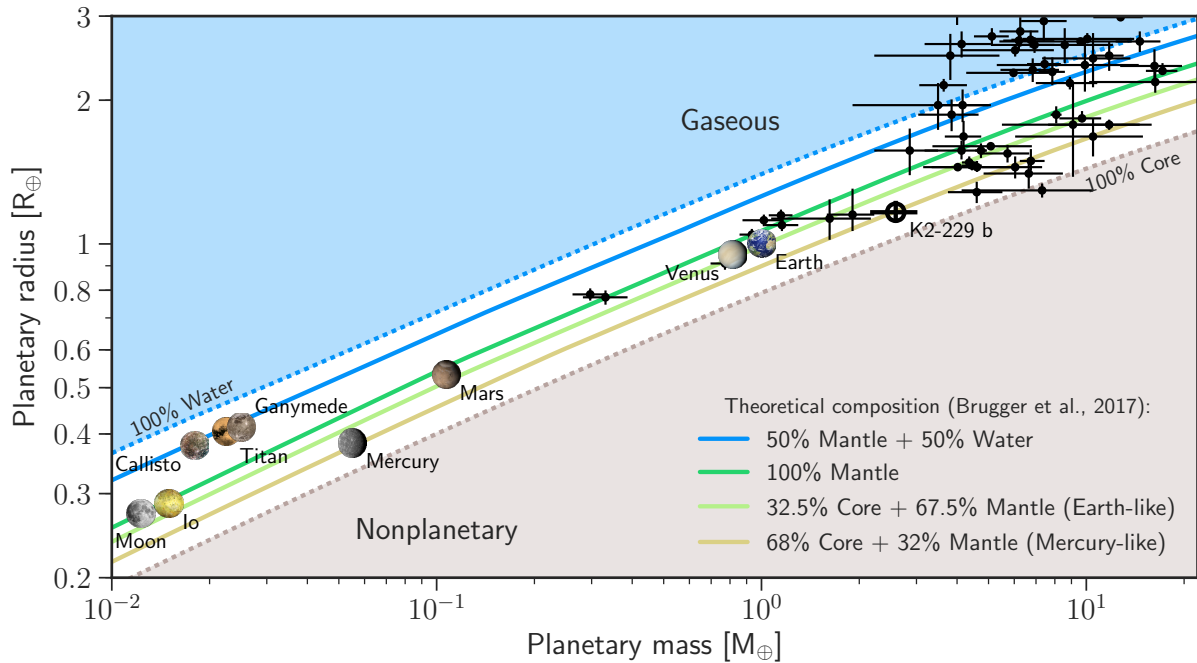

Supplementary Figure 7: **Mass – Radius diagram of known rocky planets.** As in Fig. 2 of the main paper, only planets that have a mass measured with a precision better than 50% are shown here (source: NASA exoplanet archive). The different lines represent possible theoretical compositions for terrestrial worlds (Brugger et al., 2017). Objects denser than 100% core are considered as non-planetary objects and those less dense than 100% water are considered to be gaseous. The rocky planets and major moons in the Solar system are displayed here for comparison.

Supplementary Table 1: **Observed magnitudes of the host star used in the spectral energy distribution**

| Bandpass  | Magnitude          | Source  |
|-----------|--------------------|---------|
| Johnson B | $11.899 \pm 0.060$ | APASS   |
| Johnson V | $11.026 \pm 0.076$ | APASS   |
| Sloan r'  | $10.789 \pm 0.070$ | APASS   |
| 2-MASS J  | $9.518 \pm 0.022$  | 2-MASS  |
| 2-MASS H  | $9.126 \pm 0.022$  | 2-MASS  |
| 2-MASS Ks | $9.050 \pm 0.023$  | 2-MASS  |
| WISE W1   | $8.969 \pm 0.024$  | AllWISE |
| WISE W2   | $9.036 \pm 0.021$  | AllWISE |
| WISE W3   | $8.989 \pm 0.032$  | AllWISE |

Supplementary Table 2: **Chemical abundances of the host star, relative to the Sun.**

| Element<br>[X/H] | Abundance<br>[dex] | Lines number |
|------------------|--------------------|--------------|
| C I              | $0.10 \pm 0.09$    | 2            |
| Na I             | $-0.01 \pm 0.04$   | 2            |
| Mg I             | $-0.04 \pm 0.02$   | 3            |
| Al I             | $0.01 \pm 0.02$    | 2            |
| Si I             | $0.02 \pm 0.04$    | 11           |
| Ca I             | $0.07 \pm 0.05$    | 9            |
| Sc I             | $-0.04 \pm 0.05$   | 3            |
| Sc II            | $-0.03 \pm 0.03$   | 6            |
| Ti I             | $0.05 \pm 0.03$    | 18           |
| Ti II            | $-0.03 \pm 0.04$   | 5            |
| Cr I             | $0.05 \pm 0.04$    | 17           |
| Cr II            | $0.03 \pm 0.07$    | 3            |
| Co I             | $0.00 \pm 0.05$    | 7            |
| Ni I             | $-0.04 \pm 0.04$   | 40           |
| Cu I             | $-0.10 \pm 0.03$   | 3            |
| Zn I             | $-0.03 \pm 0.06$   | 3            |
| Sr I             | $-0.18 \pm 0.07$   | 1            |
| Y II             | $0.00 \pm 0.03$    | 6            |
| Zr II            | $0.01 \pm 0.08$    | 1            |
| Ba II            | $-0.01 \pm 0.04$   | 3            |
| Ce II            | $0.06 \pm 0.01$    | 2            |
| Nd II            | $-0.02 \pm 0.07$   | 2            |
| A(Li I)*         | $< -0.1$           | 1            |

\*A(Li) =  $\log[N(\text{Li})/N(\text{H})] + 12$

Supplementary Table 3: **Radial velocity data.** Signal-to-noise ratio (S/N) is given per CCD pixel at 550nm.

| Time<br>[BJD] | RV<br>[km.s <sup>-1</sup> ] | $\sigma$ RV<br>[m.s <sup>-1</sup> ] | FWHM<br>[km.s <sup>-1</sup> ] | $\sigma$ FWHM<br>[m.s <sup>-1</sup> ] | BIS<br>[m.s <sup>-1</sup> ] | $\sigma$ BIS<br>[m.s <sup>-1</sup> ] | Texp<br>[s] | S/N  |
|---------------|-----------------------------|-------------------------------------|-------------------------------|---------------------------------------|-----------------------------|--------------------------------------|-------------|------|
| 57781.76495   | 22.96262                    | 3.04                                | 7.1917                        | 6.1                                   | 2.8                         | 6.1                                  | 1800        | 33.9 |
| 57781.87130   | 22.96912                    | 1.97                                | 7.1841                        | 3.9                                   | -2.3                        | 3.9                                  | 1800        | 50.5 |
| 57782.73630   | 22.96798                    | 2.10                                | 7.1852                        | 4.2                                   | -2.4                        | 4.2                                  | 1800        | 47.3 |
| 57782.84805   | 22.97103                    | 1.67                                | 7.1958                        | 3.3                                   | -4.7                        | 3.3                                  | 1800        | 60.4 |
| 57783.78366   | 22.98796                    | 1.89                                | 7.1878                        | 3.8                                   | -6.3                        | 3.8                                  | 1800        | 52.1 |
| 57783.86073   | 22.98747                    | 1.72                                | 7.2099                        | 3.4                                   | -12.0                       | 3.4                                  | 1800        | 59.1 |
| 57784.76590   | 22.99968                    | 1.62                                | 7.2268                        | 3.2                                   | -25.2                       | 3.2                                  | 1800        | 62.4 |
| 57784.84541   | 22.99819                    | 1.64                                | 7.2272                        | 3.3                                   | -14.1                       | 3.3                                  | 1800        | 62.5 |
| 57785.76998   | 23.00099                    | 1.67                                | 7.2615                        | 3.3                                   | -21.4                       | 3.3                                  | 1800        | 54.0 |
| 57785.85815   | 23.00364                    | 1.88                                | 7.2614                        | 3.8                                   | -12.3                       | 3.8                                  | 1800        | 59.7 |
| 57787.77787   | 22.99600                    | 1.91                                | 7.2969                        | 3.8                                   | 1.3                         | 3.8                                  | 1800        | 50.9 |
| 57787.87108   | 22.99278                    | 1.99                                | 7.2935                        | 4.0                                   | 9.1                         | 4.0                                  | 1800        | 52.1 |
| 57789.79293   | 22.98413                    | 1.71                                | 7.2747                        | 3.4                                   | 15.2                        | 3.4                                  | 1800        | 58.2 |
| 57789.87067   | 22.98175                    | 1.64                                | 7.2871                        | 3.3                                   | 13.9                        | 3.3                                  | 1800        | 62.3 |
| 57792.75641   | 22.98598                    | 1.49                                | 7.2585                        | 3.0                                   | 3.9                         | 3.0                                  | 1800        | 67.3 |
| 57792.86926   | 22.98393                    | 1.45                                | 7.2511                        | 2.9                                   | 5.4                         | 2.9                                  | 1800        | 72.3 |
| 57795.76119   | 22.96468                    | 1.92                                | 7.2228                        | 3.8                                   | 6.2                         | 3.8                                  | 1800        | 64.6 |
| 57795.85749   | 22.97004                    | 1.58                                | 7.2325                        | 3.2                                   | 5.2                         | 3.2                                  | 1800        | 50.4 |
| 57796.76768   | 22.96787                    | 1.69                                | 7.2088                        | 3.4                                   | 5.3                         | 3.4                                  | 1800        | 57.7 |
| 57796.87009   | 22.96349                    | 1.75                                | 7.2181                        | 3.5                                   | 14.6                        | 3.5                                  | 1800        | 56.9 |
| 57797.73489   | 22.97104                    | 1.67                                | 7.2088                        | 3.3                                   | 7.5                         | 3.3                                  | 1800        | 58.3 |
| 57797.84788   | 22.96597                    | 1.77                                | 7.2107                        | 3.5                                   | 6.1                         | 3.5                                  | 1800        | 56.2 |
| 57801.76002   | 22.98284                    | 1.67                                | 7.2199                        | 3.3                                   | -5.1                        | 3.3                                  | 1800        | 59.1 |
| 57801.87033   | 22.98831                    | 1.65                                | 7.2194                        | 3.3                                   | -16.2                       | 3.3                                  | 1800        | 61.7 |
| 57802.69979   | 22.98807                    | 1.76                                | 7.2400                        | 3.5                                   | -13.3                       | 3.5                                  | 1800        | 58.4 |
| 57802.81121   | 22.98670                    | 1.70                                | 7.2355                        | 3.4                                   | -13.1                       | 3.4                                  | 1800        | 55.2 |
| 57802.87940   | 22.99206                    | 2.06                                | 7.2364                        | 4.1                                   | -21.3                       | 4.1                                  | 1800        | 48.7 |
| 57803.70032   | 23.00199                    | 1.71                                | 7.2464                        | 3.4                                   | -6.7                        | 3.4                                  | 1800        | 65.2 |
| 57803.78655   | 22.99929                    | 1.56                                | 7.2569                        | 3.1                                   | -11.0                       | 3.1                                  | 1800        | 62.2 |
| 57803.87436   | 22.99517                    | 1.65                                | 7.2488                        | 3.3                                   | -17.7                       | 3.3                                  | 1800        | 57.3 |
| 57810.69880   | 22.97475                    | 1.99                                | 7.2777                        | 4.0                                   | 19.1                        | 4.0                                  | 1800        | 49.7 |
| 57810.76684   | 22.97328                    | 1.70                                | 7.2685                        | 3.4                                   | 14.1                        | 3.4                                  | 1800        | 60.4 |
| 57810.82339   | 22.97106                    | 1.69                                | 7.2665                        | 3.4                                   | 20.1                        | 3.4                                  | 1800        | 59.2 |
| 57814.74239   | 22.96754                    | 1.57                                | 7.2127                        | 3.1                                   | 7.9                         | 3.1                                  | 1800        | 62.7 |
| 57814.80162   | 22.96855                    | 1.62                                | 7.2066                        | 3.2                                   | 14.7                        | 3.2                                  | 1800        | 62.4 |
| 57814.87005   | 22.96820                    | 1.66                                | 7.2172                        | 3.3                                   | 10.1                        | 3.3                                  | 1800        | 64.5 |
| 57815.72466   | 22.97207                    | 1.50                                | 7.2030                        | 3.0                                   | 5.2                         | 3.0                                  | 1800        | 67.7 |

Continued on next page

**Supplementary Table 3 – continued from previous page**

| Time        | RV       | $\sigma$ RV | FWHM   | $\sigma$ FWHM | BIS   | $\sigma$ BIS | Texp | S/N  |
|-------------|----------|-------------|--------|---------------|-------|--------------|------|------|
| 57815.79867 | 22.97533 | 1.49        | 7.2033 | 3.0           | 3.4   | 3.0          | 1800 | 69.4 |
| 57817.72541 | 22.98117 | 1.59        | 7.2028 | 3.2           | 2.9   | 3.2          | 1800 | 74.6 |
| 57817.79480 | 22.98127 | 1.44        | 7.1948 | 2.9           | -4.9  | 2.9          | 1800 | 72.7 |
| 57817.86392 | 22.97831 | 1.57        | 7.2061 | 3.1           | -1.8  | 3.1          | 1800 | 63.5 |
| 57818.67656 | 22.97594 | 1.72        | 7.2107 | 3.4           | 7.2   | 3.4          | 1800 | 66.9 |
| 57818.87779 | 22.97105 | 1.67        | 7.2008 | 3.3           | 0.1   | 3.3          | 1800 | 57.3 |
| 57820.73861 | 22.97005 | 1.63        | 7.2150 | 3.3           | 1.5   | 3.3          | 1800 | 62.5 |
| 57820.88832 | 22.96987 | 1.65        | 7.2026 | 3.3           | 1.5   | 3.3          | 1800 | 62.5 |
| 57822.75416 | 22.99052 | 1.74        | 7.2404 | 3.5           | -12.3 | 3.5          | 1800 | 64.2 |
| 57822.86984 | 22.99679 | 1.63        | 7.2394 | 3.3           | -11.0 | 3.3          | 1800 | 58.5 |
| 57823.71192 | 22.99996 | 1.69        | 7.2468 | 3.4           | -11.9 | 3.4          | 1800 | 64.6 |
| 57823.83799 | 22.99990 | 1.54        | 7.2522 | 3.1           | -7.9  | 3.1          | 1800 | 60.3 |
| 57824.73826 | 22.99528 | 1.84        | 7.2661 | 3.7           | -3.5  | 3.7          | 1800 | 69.6 |
| 57824.85688 | 22.98925 | 2.13        | 7.2442 | 4.3           | -9.9  | 4.3          | 1800 | 49.5 |
| 57825.61285 | 22.98874 | 2.02        | 7.2437 | 4.0           | 1.6   | 4.0          | 1800 | 56.4 |
| 57825.69561 | 22.99004 | 2.22        | 7.2355 | 4.4           | -0.6  | 4.4          | 1800 | 50.5 |
| 57826.61499 | 22.98234 | 1.81        | 7.2074 | 3.6           | 12.9  | 3.6          | 1800 | 46.4 |
| 57826.69513 | 22.98262 | 1.55        | 7.2276 | 3.1           | 5.2   | 3.1          | 1800 | 68.8 |
| 57830.61237 | 22.97329 | 1.72        | 7.2426 | 3.4           | 10.9  | 3.4          | 1800 | 58.2 |
| 57830.70218 | 22.97121 | 1.68        | 7.2416 | 3.4           | 13.0  | 3.4          | 1800 | 59.5 |
| 57832.62603 | 22.96325 | 2.33        | 7.2240 | 4.7           | 6.1   | 4.7          | 1800 | 60.3 |
| 57832.69245 | 22.96544 | 2.47        | 7.2143 | 4.9           | 20.9  | 4.9          | 1800 | 43.4 |
| 57835.61973 | 22.97648 | 1.99        | 7.1835 | 4.0           | -0.6  | 4.0          | 1800 | 41.0 |
| 57835.68334 | 22.97675 | 2.02        | 7.1851 | 4.0           | 3.5   | 4.0          | 1800 | 49.9 |
| 57837.61343 | 22.98294 | 2.58        | 7.1942 | 5.2           | -16.8 | 5.2          | 1800 | 50.2 |
| 57837.68514 | 22.98510 | 1.88        | 7.2049 | 3.8           | -20.9 | 3.8          | 1800 | 39.8 |
| 57838.62623 | 22.98949 | 1.71        | 7.2080 | 3.4           | -9.6  | 3.4          | 1800 | 54.0 |
| 57838.69385 | 22.98780 | 1.59        | 7.2117 | 3.2           | -8.2  | 3.2          | 1800 | 59.6 |
| 57839.61873 | 22.98254 | 1.77        | 7.2208 | 3.5           | -4.5  | 3.5          | 1800 | 65.6 |
| 57839.68564 | 22.98513 | 1.89        | 7.2271 | 3.8           | -1.5  | 3.8          | 1800 | 54.3 |
| 57840.59140 | 22.99028 | 2.08        | 7.2446 | 4.2           | -7.8  | 4.2          | 1800 | 57.9 |
| 57840.68190 | 22.99225 | 1.79        | 7.2339 | 3.6           | -13.6 | 3.6          | 1800 | 48.3 |
| 57841.61517 | 23.00082 | 1.92        | 7.2535 | 3.8           | -15.9 | 3.8          | 1800 | 57.3 |
| 57841.68068 | 23.00483 | 2.21        | 7.2501 | 4.4           | -13.0 | 4.4          | 1800 | 51.8 |
| 57843.59261 | 22.99742 | 2.20        | 7.2820 | 4.4           | 9.1   | 4.4          | 1800 | 45.8 |
| 57843.68040 | 22.99376 | 1.72        | 7.2787 | 3.4           | 11.5  | 3.4          | 1800 | 46.0 |
| 57844.60389 | 22.98239 | 1.86        | 7.2675 | 3.7           | 25.2  | 3.7          | 1800 | 60.0 |
| 57844.70188 | 22.98156 | 1.79        | 7.2620 | 3.6           | 11.5  | 3.6          | 1800 | 54.7 |
| 57846.62813 | 22.97623 | 1.74        | 7.2438 | 3.5           | 9.9   | 3.5          | 1800 | 57.7 |
| 57846.80297 | 22.97892 | 1.89        | 7.2333 | 3.8           | 1.5   | 3.8          | 1800 | 55.3 |

Continued on next page

**Supplementary Table 3 – continued from previous page**

| Time        | RV       | $\sigma$ RV | FWHM   | $\sigma$ FWHM | BIS   | $\sigma$ BIS | Texp | S/N  |
|-------------|----------|-------------|--------|---------------|-------|--------------|------|------|
| 57847.74031 | 22.96981 | 1.81        | 7.2420 | 3.6           | 15.4  | 3.6          | 1800 | 58.4 |
| 57847.82407 | 22.97199 | 1.99        | 7.2515 | 4.0           | 12.7  | 4.0          | 1800 | 52.2 |
| 57848.61285 | 22.97262 | 1.71        | 7.2350 | 3.4           | 14.9  | 3.4          | 1800 | 56.6 |
| 57848.80183 | 22.96767 | 1.89        | 7.2316 | 3.8           | 15.9  | 3.8          | 1800 | 55.0 |
| 57849.64778 | 22.96242 | 1.78        | 7.2267 | 3.6           | 9.3   | 3.6          | 1800 | 59.3 |
| 57849.81563 | 22.96336 | 1.79        | 7.2205 | 3.6           | 9.3   | 3.6          | 1800 | 58.8 |
| 57850.65302 | 22.95665 | 1.72        | 7.2165 | 3.4           | 12.6  | 3.4          | 1800 | 57.5 |
| 57850.77649 | 22.96254 | 1.76        | 7.2004 | 3.5           | 17.5  | 3.5          | 1800 | 58.5 |
| 57851.64011 | 22.96112 | 1.95        | 7.1943 | 3.9           | 16.7  | 3.9          | 1800 | 59.1 |
| 57851.76545 | 22.95857 | 1.95        | 7.1935 | 3.9           | 13.1  | 3.9          | 1800 | 51.6 |
| 57852.57973 | 22.96065 | 2.11        | 7.1723 | 4.2           | 5.3   | 4.2          | 1800 | 52.6 |
| 57852.74425 | 22.96087 | 2.22        | 7.1870 | 4.4           | 11.4  | 4.4          | 1800 | 47.0 |
| 57854.63054 | 22.97574 | 1.75        | 7.1913 | 3.5           | -18.7 | 3.5          | 1800 | 45.9 |
| 57854.78599 | 22.97001 | 2.31        | 7.1884 | 4.6           | -17.0 | 4.6          | 1800 | 45.4 |
| 57855.57138 | 22.98450 | 1.62        | 7.2062 | 3.2           | -13.3 | 3.2          | 1800 | 58.7 |
| 57855.79070 | 22.97817 | 1.75        | 7.1882 | 3.5           | -11.4 | 3.5          | 1800 | 62.4 |
| 57859.59924 | 22.99746 | 1.90        | 7.2543 | 3.8           | -11.9 | 3.8          | 1800 | 59.7 |
| 57862.64930 | 22.99331 | 2.20        | 7.2744 | 4.4           | 19.6  | 4.4          | 1800 | 53.3 |
| 57864.54050 | 22.98528 | 1.71        | 7.2560 | 3.4           | 13.3  | 3.4          | 1800 | 46.3 |
| 57865.56618 | 22.98559 | 1.70        | 7.2522 | 3.4           | 11.4  | 3.4          | 1800 | 59.3 |
| 57865.73339 | 22.97901 | 1.58        | 7.2526 | 3.2           | 12.1  | 3.2          | 1800 | 60.6 |
| 57872.51969 | 22.96738 | 1.89        | 7.1781 | 3.8           | -3.6  | 3.8          | 1800 | 68.1 |
| 57872.61136 | 22.96180 | 2.18        | 7.1708 | 4.4           | -15.7 | 4.4          | 1800 | 46.0 |
| 57872.68106 | 22.96385 | 2.02        | 7.1691 | 4.0           | -11.9 | 4.0          | 1800 | 52.6 |
| 57873.55099 | 22.97416 | 1.95        | 7.1922 | 3.9           | -9.8  | 3.9          | 1800 | 50.1 |
| 57873.61263 | 22.97586 | 1.77        | 7.1910 | 3.5           | -17.1 | 3.5          | 1800 | 60.9 |
| 57873.70036 | 22.97391 | 1.68        | 7.1734 | 3.4           | -9.3  | 3.4          | 1800 | 58.5 |
| 57873.73531 | 22.97357 | 1.77        | 7.1865 | 3.5           | -8.9  | 3.5          | 1800 | 57.1 |
| 57874.52041 | 22.97811 | 1.92        | 7.1909 | 3.8           | -7.1  | 3.8          | 1800 | 51.1 |
| 57874.59351 | 22.98144 | 2.21        | 7.1959 | 4.4           | -11.0 | 4.4          | 1800 | 45.4 |
| 57874.72207 | 22.98007 | 2.27        | 7.2057 | 4.5           | -16.6 | 4.5          | 1800 | 52.2 |
| 57875.55937 | 22.99146 | 1.72        | 7.2127 | 3.4           | -6.2  | 3.4          | 1800 | 45.1 |
| 57875.63925 | 22.98725 | 1.94        | 7.2114 | 3.9           | -13.9 | 3.9          | 1800 | 52.7 |
| 57875.73924 | 22.99051 | 5.05        | 7.1676 | 10.1          | -32.8 | 10.1         | 1800 | 59.7 |
| 57876.53621 | 22.99520 | 1.81        | 7.2257 | 3.6           | -5.0  | 3.6          | 1800 | 23.9 |
| 57876.63080 | 22.99870 | 1.50        | 7.2336 | 3.0           | -3.1  | 3.0          | 1800 | 67.1 |
| 57876.68624 | 22.99734 | 1.59        | 7.2291 | 3.2           | -12.5 | 3.2          | 1800 | 56.1 |
| 57876.74076 | 22.99568 | 1.96        | 7.2409 | 3.9           | -11.9 | 3.9          | 1800 | 53.3 |
| 57877.54661 | 22.99251 | 1.63        | 7.2438 | 3.3           | -8.4  | 3.3          | 1800 | 70.9 |
| 57877.63432 | 22.99688 | 1.72        | 7.2505 | 3.4           | -13.2 | 3.4          | 1800 | 48.1 |

Continued on next page

**Supplementary Table 3 – continued from previous page**

| Time        | RV       | $\sigma$ RV | FWHM   | $\sigma$ FWHM | BIS   | $\sigma$ BIS | Texp | S/N  |
|-------------|----------|-------------|--------|---------------|-------|--------------|------|------|
| 57877.69036 | 22.99911 | 1.78        | 7.2457 | 3.6           | -7.0  | 3.6          | 1800 | 63.2 |
| 57877.75585 | 22.99419 | 2.13        | 7.2397 | 4.3           | -23.4 | 4.3          | 1800 | 60.4 |

**Supplementary Table 4: Spectroscopic indices.**

| Time<br>[BJD] | $S_{\text{MW}}$ | $\sigma S_{\text{MW}}$ | $I_{H\alpha}$ | $\sigma I_{H\alpha}$ | $I_{\text{NaD}}$ | $\sigma I_{\text{NaD}}$ | $I_{\text{HeID3}}$ | $\sigma I_{\text{HeID3}}$ |
|---------------|-----------------|------------------------|---------------|----------------------|------------------|-------------------------|--------------------|---------------------------|
| 57781.76495   | 0.3631          | 0.0144                 | 0.3279        | 0.0016               | 0.3302           | 0.0046                  | 0.4999             | 0.0020                    |
| 57781.87130   | 0.3472          | 0.0077                 | 0.3277        | 0.0013               | 0.3314           | 0.0035                  | 0.5003             | 0.0018                    |
| 57782.73630   | 0.3673          | 0.0084                 | 0.3268        | 0.0012               | 0.3322           | 0.0044                  | 0.5023             | 0.0020                    |
| 57782.84805   | 0.3573          | 0.0062                 | 0.3290        | 0.0012               | 0.3302           | 0.0036                  | 0.5044             | 0.0018                    |
| 57783.78366   | 0.3685          | 0.0070                 | 0.3289        | 0.0014               | 0.3303           | 0.0040                  | 0.5005             | 0.0019                    |
| 57783.86073   | 0.3704          | 0.0067                 | 0.3301        | 0.0011               | 0.3329           | 0.0030                  | 0.5003             | 0.0016                    |
| 57784.76590   | 0.3888          | 0.0052                 | 0.3325        | 0.0011               | 0.3374           | 0.0029                  | 0.5029             | 0.0017                    |
| 57784.84541   | 0.3865          | 0.0061                 | 0.3322        | 0.0011               | 0.3364           | 0.0029                  | 0.5023             | 0.0016                    |
| 57785.76998   | 0.4147          | 0.0054                 | 0.3358        | 0.0012               | 0.3349           | 0.0029                  | 0.5040             | 0.0016                    |
| 57785.85815   | 0.4068          | 0.0076                 | 0.3340        | 0.0011               | 0.3351           | 0.0029                  | 0.5023             | 0.0015                    |
| 57787.77787   | 0.4299          | 0.0066                 | 0.3355        | 0.0011               | 0.3380           | 0.0033                  | 0.5018             | 0.0018                    |
| 57787.87108   | 0.4206          | 0.0079                 | 0.3355        | 0.0012               | 0.3374           | 0.0033                  | 0.5026             | 0.0017                    |
| 57789.79293   | 0.4400          | 0.0057                 | 0.3359        | 0.0009               | 0.3360           | 0.0028                  | 0.5015             | 0.0016                    |
| 57789.87067   | 0.4165          | 0.0060                 | 0.3356        | 0.0010               | 0.3368           | 0.0028                  | 0.5024             | 0.0016                    |
| 57792.75641   | 0.4082          | 0.0043                 | 0.3338        | 0.0010               | 0.3368           | 0.0025                  | 0.5024             | 0.0014                    |
| 57792.86926   | 0.4052          | 0.0050                 | 0.3354        | 0.0009               | 0.3372           | 0.0024                  | 0.4991             | 0.0015                    |
| 57795.76119   | 0.3787          | 0.0063                 | 0.3329        | 0.0011               | 0.3355           | 0.0027                  | 0.5022             | 0.0015                    |
| 57795.85749   | 0.3788          | 0.0054                 | 0.3327        | 0.0076               | 0.3370           | 0.0027                  | 0.5026             | 0.0018                    |
| 57796.76768   | 0.3872          | 0.0054                 | 0.3322        | 0.0011               | 0.3345           | 0.0029                  | 0.5042             | 0.0016                    |
| 57796.87009   | 0.3777          | 0.0062                 | 0.3305        | 0.0011               | 0.3328           | 0.0029                  | 0.5007             | 0.0018                    |
| 57797.73489   | 0.3660          | 0.0050                 | 0.3292        | 0.0012               | 0.3328           | 0.0035                  | 0.5032             | 0.0018                    |
| 57797.84788   | 0.3637          | 0.0063                 | 0.3303        | 0.0013               | 0.3329           | 0.0032                  | 0.5122             | 0.0018                    |
| 57801.76002   | 0.3860          | 0.0055                 | 0.3312        | 0.0012               | 0.3362           | 0.0029                  | 0.5010             | 0.0016                    |
| 57801.87033   | 0.3815          | 0.0061                 | 0.3301        | 0.0011               | 0.3342           | 0.0030                  | 0.5024             | 0.0017                    |
| 57802.69979   | 0.4015          | 0.0057                 | 0.3317        | 0.0012               | 0.3334           | 0.0035                  | 0.5019             | 0.0019                    |
| 57802.81121   | 0.4012          | 0.0059                 | 0.3316        | 0.0012               | 0.3327           | 0.0037                  | 0.5032             | 0.0018                    |
| 57802.87940   | 0.3816          | 0.0087                 | 0.3302        | 0.0014               | 0.3316           | 0.0038                  | 0.5024             | 0.0020                    |
| 57803.70032   | 0.4077          | 0.0055                 | 0.3330        | 0.0011               | 0.3327           | 0.0033                  | 0.5015             | 0.0017                    |
| 57803.78655   | 0.4133          | 0.0051                 | 0.3318        | 0.0012               | 0.3304           | 0.0039                  | 0.4999             | 0.0018                    |
| 57803.87436   | 0.4193          | 0.0064                 | 0.3326        | 0.0013               | 0.3321           | 0.0038                  | 0.4989             | 0.0017                    |
| 57810.69880   | 0.4145          | 0.0072                 | 0.3333        | 0.0014               | 0.3267           | 0.0048                  | 0.5010             | 0.0022                    |
| 57810.76684   | 0.4217          | 0.0061                 | 0.3323        | 0.0011               | 0.3269           | 0.0045                  | 0.4967             | 0.0018                    |
| 57810.82339   | 0.4233          | 0.0065                 | 0.3334        | 0.0013               | 0.3316           | 0.0046                  | 0.4999             | 0.0019                    |

Continued on next page

**Supplementary Table 4 – continued from previous page**

| Time        | $S_{MW}$ | $\sigma S_{MW}$ | $I_{H\alpha}$ | $\sigma I_{H\alpha}$ | $I_{NaD}$ | $\sigma I_{NaD}$ | $I_{HeID3}$ | $\sigma I_{HeID3}$ |
|-------------|----------|-----------------|---------------|----------------------|-----------|------------------|-------------|--------------------|
| 57814.74239 | 0.3742   | 0.0053          | 0.3298        | 0.0010               | 0.3318    | 0.0040           | 0.5005      | 0.0017             |
| 57814.80162 | 0.3786   | 0.0059          | 0.3314        | 0.0010               | 0.3291    | 0.0046           | 0.4977      | 0.0018             |
| 57814.87005 | 0.3713   | 0.0071          | 0.3318        | 0.0011               | 0.3322    | 0.0040           | 0.5008      | 0.0018             |
| 57815.72466 | 0.3687   | 0.0049          | 0.3303        | 0.0011               | 0.3325    | 0.0038           | 0.4983      | 0.0019             |
| 57815.79867 | 0.3579   | 0.0053          | 0.3302        | 0.0010               | 0.3322    | 0.0034           | 0.5010      | 0.0016             |
| 57817.72541 | 0.3576   | 0.0055          | 0.3298        | 0.0010               | 0.3365    | 0.0032           | 0.5023      | 0.0015             |
| 57817.79480 | 0.3543   | 0.0050          | 0.3306        | 0.0010               | 0.3342    | 0.0032           | 0.5008      | 0.0015             |
| 57817.86392 | 0.3572   | 0.0068          | 0.3287        | 0.0010               | 0.3335    | 0.0034           | 0.4998      | 0.0015             |
| 57818.67656 | 0.3638   | 0.0057          | 0.3300        | 0.0011               | 0.3336    | 0.0028           | 0.4998      | 0.0017             |
| 57818.87779 | 0.3499   | 0.0074          | 0.3287        | 0.0010               | 0.3367    | 0.0028           | 0.5034      | 0.0016             |
| 57820.73861 | 0.3954   | 0.0061          | 0.3294        | 0.0011               | 0.3323    | 0.0037           | 0.5015      | 0.0016             |
| 57820.88832 | 0.3951   | 0.0080          | 0.3292        | 0.0010               | 0.3336    | 0.0033           | 0.5000      | 0.0015             |
| 57822.75416 | 0.4231   | 0.0066          | 0.3326        | 0.0010               | 0.3381    | 0.0028           | 0.5036      | 0.0014             |
| 57822.86984 | 0.4130   | 0.0070          | 0.3330        | 0.0009               | 0.3371    | 0.0030           | 0.5008      | 0.0015             |
| 57823.71192 | 0.4137   | 0.0060          | 0.3335        | 0.0011               | 0.3393    | 0.0027           | 0.5009      | 0.0015             |
| 57823.83799 | 0.4193   | 0.0066          | 0.3338        | 0.0009               | 0.3363    | 0.0027           | 0.5001      | 0.0014             |
| 57824.73826 | 0.4299   | 0.0073          | 0.3353        | 0.0013               | 0.3410    | 0.0031           | 0.5019      | 0.0016             |
| 57824.85688 | 0.4137   | 0.0095          | 0.3358        | 0.0011               | 0.3402    | 0.0028           | 0.5003      | 0.0015             |
| 57825.61285 | 0.3972   | 0.0073          | 0.3348        | 0.0011               | 0.3436    | 0.0034           | 0.5016      | 0.0016             |
| 57825.69561 | 0.4040   | 0.0088          | 0.3349        | 0.0013               | 0.3444    | 0.0033           | 0.5009      | 0.0016             |
| 57826.61499 | 0.3883   | 0.0062          | 0.3329        | 0.0009               | 0.3406    | 0.0028           | 0.4992      | 0.0013             |
| 57826.69513 | 0.3880   | 0.0053          | 0.3323        | 0.0014               | 0.3414    | 0.0036           | 0.4993      | 0.0016             |
| 57830.61237 | 0.3782   | 0.0065          | 0.3309        | 0.0012               | 0.3313    | 0.0038           | 0.5006      | 0.0014             |
| 57830.70218 | 0.4093   | 0.0058          | 0.3383        | 0.0012               | 0.3333    | 0.0035           | 0.5004      | 0.0015             |
| 57832.62603 | 0.3629   | 0.0105          | 0.3302        | 0.0015               | 0.3330    | 0.0043           | 0.4973      | 0.0018             |
| 57832.69245 | 0.3502   | 0.0109          | 0.3322        | 0.0014               | 0.3365    | 0.0036           | 0.5025      | 0.0020             |
| 57835.61973 | 0.3481   | 0.0080          | 0.3302        | 0.0013               | 0.3358    | 0.0031           | 0.5024      | 0.0015             |
| 57835.68334 | 0.3470   | 0.0093          | 0.3297        | 0.0012               | 0.3350    | 0.0028           | 0.5038      | 0.0015             |
| 57837.61343 | 0.3395   | 0.0124          | 0.3289        | 0.0011               | 0.3370    | 0.0032           | 0.5005      | 0.0018             |
| 57837.68514 | 0.3620   | 0.0080          | 0.3294        | 0.0011               | 0.3337    | 0.0029           | 0.5021      | 0.0017             |
| 57838.62623 | 0.3573   | 0.0064          | 0.3306        | 0.0011               | 0.3370    | 0.0026           | 0.5031      | 0.0015             |
| 57838.69385 | 0.3740   | 0.0064          | 0.3315        | 0.0010               | 0.3354    | 0.0025           | 0.5025      | 0.0014             |
| 57839.61873 | 0.4068   | 0.0068          | 0.3324        | 0.0012               | 0.3362    | 0.0027           | 0.5041      | 0.0016             |
| 57839.68564 | 0.3747   | 0.0083          | 0.3322        | 0.0010               | 0.3347    | 0.0031           | 0.5016      | 0.0014             |
| 57840.59140 | 0.3733   | 0.0085          | 0.3329        | 0.0012               | 0.3395    | 0.0028           | 0.5048      | 0.0015             |
| 57840.68190 | 0.3849   | 0.0076          | 0.3333        | 0.0011               | 0.3352    | 0.0025           | 0.5011      | 0.0015             |
| 57841.61517 | 0.4017   | 0.0070          | 0.3312        | 0.0011               | 0.3313    | 0.0039           | 0.5003      | 0.0017             |
| 57841.68068 | 0.3836   | 0.0098          | 0.3335        | 0.0013               | 0.3347    | 0.0031           | 0.4996      | 0.0015             |
| 57843.59261 | 0.3981   | 0.0092          | 0.3348        | 0.0012               | 0.3416    | 0.0028           | 0.5000      | 0.0019             |
| 57843.68040 | 0.3952   | 0.0071          | 0.3348        | 0.0010               | 0.3374    | 0.0025           | 0.5001      | 0.0014             |

Continued on next page

**Supplementary Table 4 – continued from previous page**

| Time        | $S_{MW}$ | $\sigma S_{MW}$ | $I_{H\alpha}$ | $\sigma I_{H\alpha}$ | $I_{NaD}$ | $\sigma I_{NaD}$ | $I_{HeID3}$ | $\sigma I_{HeID3}$ |
|-------------|----------|-----------------|---------------|----------------------|-----------|------------------|-------------|--------------------|
| 57844.60389 | 0.4199   | 0.0073          | 0.3327        | 0.0011               | 0.3322    | 0.0034           | 0.4986      | 0.0013             |
| 57844.70188 | 0.4125   | 0.0077          | 0.3339        | 0.0011               | 0.3326    | 0.0032           | 0.4985      | 0.0015             |
| 57846.62813 | 0.3856   | 0.0067          | 0.3320        | 0.0013               | 0.3305    | 0.0032           | 0.4996      | 0.0015             |
| 57846.80297 | 0.3710   | 0.0097          | 0.3324        | 0.0010               | 0.3330    | 0.0026           | 0.5022      | 0.0014             |
| 57847.74031 | 0.3773   | 0.0077          | 0.3326        | 0.0011               | 0.3338    | 0.0030           | 0.5011      | 0.0017             |
| 57847.82407 | 0.3756   | 0.0106          | 0.3321        | 0.0011               | 0.3349    | 0.0027           | 0.5016      | 0.0017             |
| 57848.61285 | 0.3688   | 0.0063          | 0.3318        | 0.0011               | 0.3306    | 0.0031           | 0.5018      | 0.0015             |
| 57848.80183 | 0.3645   | 0.0096          | 0.3325        | 0.0011               | 0.3349    | 0.0028           | 0.5022      | 0.0016             |
| 57849.64778 | 0.3584   | 0.0075          | 0.3313        | 0.0009               | 0.3356    | 0.0026           | 0.5007      | 0.0013             |
| 57849.81563 | 0.3455   | 0.0100          | 0.3314        | 0.0012               | 0.3332    | 0.0026           | 0.5033      | 0.0016             |
| 57850.65302 | 0.3639   | 0.0067          | 0.3320        | 0.0010               | 0.3327    | 0.0026           | 0.5027      | 0.0014             |
| 57850.77649 | 0.3691   | 0.0083          | 0.3320        | 0.0012               | 0.3329    | 0.0028           | 0.5008      | 0.0014             |
| 57851.64011 | 0.3515   | 0.0079          | 0.3297        | 0.0010               | 0.3340    | 0.0029           | 0.5071      | 0.0014             |
| 57851.76545 | 0.3438   | 0.0090          | 0.3300        | 0.0012               | 0.3324    | 0.0029           | 0.5022      | 0.0014             |
| 57852.57973 | 0.3313   | 0.0084          | 0.3301        | 0.0012               | 0.3381    | 0.0030           | 0.5028      | 0.0017             |
| 57852.74425 | 0.3274   | 0.0099          | 0.3290        | 0.0014               | 0.3374    | 0.0030           | 0.5025      | 0.0016             |
| 57854.63054 | 0.3315   | 0.0066          | 0.3288        | 0.0011               | 0.3376    | 0.0030           | 0.4987      | 0.0017             |
| 57854.78599 | 0.3186   | 0.0110          | 0.3293        | 0.0011               | 0.3362    | 0.0025           | 0.5021      | 0.0014             |
| 57855.57138 | 0.3781   | 0.0056          | 0.3308        | 0.0011               | 0.3331    | 0.0026           | 0.5012      | 0.0014             |
| 57855.79070 | 0.3371   | 0.0084          | 0.3307        | 0.0012               | 0.3324    | 0.0032           | 0.5044      | 0.0014             |
| 57859.59924 | 0.3951   | 0.0078          | 0.3346        | 0.0010               | 0.3357    | 0.0029           | 0.5014      | 0.0015             |
| 57862.64930 | 0.4141   | 0.0100          | 0.3355        | 0.0012               | 0.3332    | 0.0029           | 0.4991      | 0.0014             |
| 57864.54050 | 0.4106   | 0.0063          | 0.3322        | 0.0010               | 0.3321    | 0.0031           | 0.4988      | 0.0013             |
| 57865.56618 | 0.3928   | 0.0064          | 0.3320        | 0.0009               | 0.3330    | 0.0032           | 0.5005      | 0.0012             |
| 57865.73339 | 0.3796   | 0.0074          | 0.3326        | 0.0008               | 0.3330    | 0.0028           | 0.5005      | 0.0013             |
| 57872.51969 | 0.3412   | 0.0074          | 0.3301        | 0.0013               | 0.3362    | 0.0027           | 0.5033      | 0.0017             |
| 57872.61136 | 0.3329   | 0.0098          | 0.3300        | 0.0015               | 0.3337    | 0.0026           | 0.5014      | 0.0016             |
| 57872.68106 | 0.3324   | 0.0091          | 0.3296        | 0.0011               | 0.3335    | 0.0029           | 0.4997      | 0.0017             |
| 57873.55099 | 0.3557   | 0.0082          | 0.3301        | 0.0010               | 0.3370    | 0.0027           | 0.5030      | 0.0015             |
| 57873.61263 | 0.3343   | 0.0075          | 0.3308        | 0.0010               | 0.3348    | 0.0026           | 0.5018      | 0.0015             |
| 57873.70036 | 0.3496   | 0.0076          | 0.3307        | 0.0010               | 0.3338    | 0.0025           | 0.5032      | 0.0015             |
| 57873.73531 | 0.3522   | 0.0093          | 0.3307        | 0.0011               | 0.3374    | 0.0026           | 0.5010      | 0.0015             |
| 57874.52041 | 0.3612   | 0.0074          | 0.3316        | 0.0012               | 0.3352    | 0.0031           | 0.4999      | 0.0017             |
| 57874.59351 | 0.3573   | 0.0095          | 0.3323        | 0.0011               | 0.3353    | 0.0027           | 0.5042      | 0.0014             |
| 57874.72207 | 0.3482   | 0.0110          | 0.3320        | 0.0015               | 0.3369    | 0.0032           | 0.5007      | 0.0015             |
| 57875.55937 | 0.3883   | 0.0069          | 0.3309        | 0.0011               | 0.3365    | 0.0028           | 0.5041      | 0.0015             |
| 57875.63925 | 0.3729   | 0.0091          | 0.3309        | 0.0010               | 0.3362    | 0.0026           | 0.5014      | 0.0015             |
| 57875.73924 | 0.2882   | 0.0399          | 0.3336        | 0.0021               | 0.3310    | 0.0049           | 0.5013      | 0.0024             |
| 57876.53621 | 0.3898   | 0.0070          | 0.3323        | 0.0010               | 0.3353    | 0.0025           | 0.5009      | 0.0014             |
| 57876.63080 | 0.3662   | 0.0060          | 0.3326        | 0.0011               | 0.3366    | 0.0027           | 0.5017      | 0.0014             |

Continued on next page



**Supplementary Table 4 – continued from previous page**

| Time        | $S_{MW}$ | $\sigma S_{MW}$ | $I_{H\alpha}$ | $\sigma I_{H\alpha}$ | $I_{NaD}$ | $\sigma I_{NaD}$ | $I_{HeID3}$ | $\sigma I_{HeID3}$ |
|-------------|----------|-----------------|---------------|----------------------|-----------|------------------|-------------|--------------------|
| 57876.68624 | 0.3875   | 0.0074          | 0.3331        | 0.0011               | 0.3351    | 0.0030           | 0.5011      | 0.0015             |
| 57876.74076 | 0.3682   | 0.0111          | 0.3323        | 0.0009               | 0.3368    | 0.0024           | 0.5022      | 0.0015             |
| 57877.54661 | 0.4020   | 0.0061          | 0.3331        | 0.0011               | 0.3385    | 0.0028           | 0.4990      | 0.0016             |
| 57877.63432 | 0.3828   | 0.0074          | 0.3341        | 0.0010               | 0.3373    | 0.0028           | 0.5010      | 0.0014             |
| 57877.69036 | 0.3707   | 0.0089          | 0.3330        | 0.0009               | 0.3384    | 0.0027           | 0.5015      | 0.0014             |
| 57877.75585 | 0.3903   | 0.0103          | 0.3337        | 0.0013               | 0.3361    | 0.0025           | 0.5018      | 0.0016             |

Supplementary Table 5: **List of parameters used in the analysis using the nightly-offset correction model (model 1) for stellar activity.** The respective priors and posteriors are provided.

| Parameter                                                 | Prior                        | Posterior            |
|-----------------------------------------------------------|------------------------------|----------------------|
| <i>Planet b Orbital Parameters</i>                        |                              |                      |
| Orbital period $P_b$ [d]                                  | (fixed)                      | 0.58425              |
| Transit epoch $T_{0,b}$ [BJD - 2457000]                   | (fixed)                      | 586.9746             |
| Radial velocity semi-amplitude $K_b$ [m.s <sup>-1</sup> ] | $\mathcal{U}(0, 10^2)$       | $2.82 \pm 0.40$      |
| Orbital eccentricity $e_b$                                | (fixed)                      | 0                    |
| Systemic radial velocity $\gamma$ [km.s <sup>-1</sup> ]   | $\mathcal{U}(-50, 50)$       | $22.9667 \pm 0.0017$ |
| <i>Nightly offsets</i>                                    |                              |                      |
| Night #1 offset $\Delta\gamma_1$ [m.s <sup>-1</sup> ]     | (fixed)                      | 0                    |
| Night #2 offset $\Delta\gamma_2$ [m.s <sup>-1</sup> ]     | $\mathcal{U}(-50000, 50000)$ | $-5.3 \pm 2.2$       |
| Night #3 offset $\Delta\gamma_3$ [m.s <sup>-1</sup> ]     | $\mathcal{U}(-50000, 50000)$ | $-19.9 \pm 2.2$      |
| Night #4 offset $\Delta\gamma_4$ [m.s <sup>-1</sup> ]     | $\mathcal{U}(-50000, 50000)$ | $-30.6 \pm 2.0$      |
| Night #5 offset $\Delta\gamma_5$ [m.s <sup>-1</sup> ]     | $\mathcal{U}(-50000, 50000)$ | $-37.7 \pm 2.1$      |
| Night #6 offset $\Delta\gamma_6$ [m.s <sup>-1</sup> ]     | $\mathcal{U}(-50000, 50000)$ | $-25.3 \pm 2.2$      |
| Night #7 offset $\Delta\gamma_7$ [m.s <sup>-1</sup> ]     | $\mathcal{U}(-50000, 50000)$ | $-18.7 \pm 2.1$      |
| Night #8 offset $\Delta\gamma_8$ [m.s <sup>-1</sup> ]     | $\mathcal{U}(-50000, 50000)$ | $-20.3 \pm 2.0$      |
| Night #9 offset $\Delta\gamma_9$ [m.s <sup>-1</sup> ]     | $\mathcal{U}(-50000, 50000)$ | $-1.8 \pm 2.1$       |
| Night #10 offset $\Delta\gamma_{10}$ [m.s <sup>-1</sup> ] | $\mathcal{U}(-50000, 50000)$ | $-1.1 \pm 2.1$       |
| Night #11 offset $\Delta\gamma_{11}$ [m.s <sup>-1</sup> ] | $\mathcal{U}(-50000, 50000)$ | $0.1 \pm 2.1$        |
| Night #12 offset $\Delta\gamma_{12}$ [m.s <sup>-1</sup> ] | $\mathcal{U}(-50000, 50000)$ | $-16.6 \pm 2.1$      |
| Night #13 offset $\Delta\gamma_{13}$ [m.s <sup>-1</sup> ] | $\mathcal{U}(-50000, 50000)$ | $-23.2 \pm 2.0$      |
| Night #14 offset $\Delta\gamma_{14}$ [m.s <sup>-1</sup> ] | $\mathcal{U}(-50000, 50000)$ | $-33.3 \pm 1.9$      |
| Night #15 offset $\Delta\gamma_{15}$ [m.s <sup>-1</sup> ] | $\mathcal{U}(-50000, 50000)$ | $-6.9 \pm 2.0$       |
| Night #16 offset $\Delta\gamma_{16}$ [m.s <sup>-1</sup> ] | $\mathcal{U}(-50000, 50000)$ | $-0.6 \pm 2.0$       |
| Night #17 offset $\Delta\gamma_{17}$ [m.s <sup>-1</sup> ] | $\mathcal{U}(-50000, 50000)$ | $-5.6 \pm 2.0$       |
| Night #18 offset $\Delta\gamma_{18}$ [m.s <sup>-1</sup> ] | $\mathcal{U}(-50000, 50000)$ | $-14.6 \pm 1.9$      |
| Night #19 offset $\Delta\gamma_{19}$ [m.s <sup>-1</sup> ] | $\mathcal{U}(-50000, 50000)$ | $-5.4 \pm 2.1$       |
| Night #20 offset $\Delta\gamma_{20}$ [m.s <sup>-1</sup> ] | $\mathcal{U}(-50000, 50000)$ | $-5.2 \pm 2.1$       |
| Night #21 offset $\Delta\gamma_{21}$ [m.s <sup>-1</sup> ] | $\mathcal{U}(-50000, 50000)$ | $-25.2 \pm 2.1$      |
| Night #22 offset $\Delta\gamma_{22}$ [m.s <sup>-1</sup> ] | $\mathcal{U}(-50000, 50000)$ | $-35.2 \pm 2.1$      |
| Night #23 offset $\Delta\gamma_{23}$ [m.s <sup>-1</sup> ] | $\mathcal{U}(-50000, 50000)$ | $-26.5 \pm 2.2$      |
| Night #24 offset $\Delta\gamma_{24}$ [m.s <sup>-1</sup> ] | $\mathcal{U}(-50000, 50000)$ | $-22.4 \pm 2.3$      |
| Night #25 offset $\Delta\gamma_{25}$ [m.s <sup>-1</sup> ] | $\mathcal{U}(-50000, 50000)$ | $-18.3 \pm 2.1$      |
| Night #26 offset $\Delta\gamma_{26}$ [m.s <sup>-1</sup> ] | $\mathcal{U}(-50000, 50000)$ | $-6.8 \pm 2.1$       |
| Night #27 offset $\Delta\gamma_{27}$ [m.s <sup>-1</sup> ] | $\mathcal{U}(-50000, 50000)$ | $2.5 \pm 2.4$        |
| Night #28 offset $\Delta\gamma_{28}$ [m.s <sup>-1</sup> ] | $\mathcal{U}(-50000, 50000)$ | $-7.9 \pm 2.3$       |
| Night #29 offset $\Delta\gamma_{29}$ [m.s <sup>-1</sup> ] | $\mathcal{U}(-50000, 50000)$ | $-18.8 \pm 2.3$      |
| Night #30 offset $\Delta\gamma_{30}$ [m.s <sup>-1</sup> ] | $\mathcal{U}(-50000, 50000)$ | $-19.3 \pm 2.1$      |
| Continued on next page                                    |                              |                      |

**Supplementary Table 5 – continued from previous page**

| Parameter                                                 | Prior                        | Posterior       |
|-----------------------------------------------------------|------------------------------|-----------------|
| Night #31 offset $\Delta\gamma_{31}$ [m.s <sup>-1</sup> ] | $\mathcal{U}(-50000, 50000)$ | $-17.4 \pm 2.2$ |
| Night #32 offset $\Delta\gamma_{32}$ [m.s <sup>-1</sup> ] | $\mathcal{U}(-50000, 50000)$ | $-27.0 \pm 2.2$ |
| Night #33 offset $\Delta\gamma_{33}$ [m.s <sup>-1</sup> ] | $\mathcal{U}(-50000, 50000)$ | $-34.2 \pm 2.2$ |
| Night #34 offset $\Delta\gamma_{34}$ [m.s <sup>-1</sup> ] | $\mathcal{U}(-50000, 50000)$ | $-30.7 \pm 2.2$ |
| Night #35 offset $\Delta\gamma_{35}$ [m.s <sup>-1</sup> ] | $\mathcal{U}(-50000, 50000)$ | $-15.9 \pm 2.1$ |
| Night #36 offset $\Delta\gamma_{36}$ [m.s <sup>-1</sup> ] | $\mathcal{U}(-50000, 50000)$ | $-10.2 \pm 2.1$ |
| Night #37 offset $\Delta\gamma_{37}$ [m.s <sup>-1</sup> ] | $\mathcal{U}(-50000, 50000)$ | $-5.7 \pm 2.1$  |
| Night #38 offset $\Delta\gamma_{38}$ [m.s <sup>-1</sup> ] | $\mathcal{U}(-50000, 50000)$ | $-3.2 \pm 2.1$  |
| Night #39 offset $\Delta\gamma_{39}$ [m.s <sup>-1</sup> ] | $\mathcal{U}(-50000, 50000)$ | $5.5 \pm 2.1$   |
| Night #40 offset $\Delta\gamma_{40}$ [m.s <sup>-1</sup> ] | $\mathcal{U}(-50000, 50000)$ | $6.0 \pm 2.1$   |
| Night #41 offset $\Delta\gamma_{41}$ [m.s <sup>-1</sup> ] | $\mathcal{U}(-50000, 50000)$ | $5.5 \pm 2.2$   |
| Night #42 offset $\Delta\gamma_{42}$ [m.s <sup>-1</sup> ] | $\mathcal{U}(-50000, 50000)$ | $7.7 \pm 2.4$   |
| Night #43 offset $\Delta\gamma_{43}$ [m.s <sup>-1</sup> ] | $\mathcal{U}(-50000, 50000)$ | $-8.8 \pm 2.2$  |
| Night #44 offset $\Delta\gamma_{44}$ [m.s <sup>-1</sup> ] | $\mathcal{U}(-50000, 50000)$ | $-14.2 \pm 2.1$ |
| Night #45 offset $\Delta\gamma_{45}$ [m.s <sup>-1</sup> ] | $\mathcal{U}(-50000, 50000)$ | $-15.3 \pm 2.1$ |
| Night #46 offset $\Delta\gamma_{46}$ [m.s <sup>-1</sup> ] | $\mathcal{U}(-50000, 50000)$ | $3.6 \pm 2.0$   |
| Night #47 offset $\Delta\gamma_{47}$ [m.s <sup>-1</sup> ] | $\mathcal{U}(-50000, 50000)$ | $-5.8 \pm 2.0$  |
| Night #48 offset $\Delta\gamma_{48}$ [m.s <sup>-1</sup> ] | $\mathcal{U}(-50000, 50000)$ | $-14.8 \pm 2.1$ |
| Night #49 offset $\Delta\gamma_{49}$ [m.s <sup>-1</sup> ] | $\mathcal{U}(-50000, 50000)$ | $-23.1 \pm 2.1$ |
| Night #50 offset $\Delta\gamma_{50}$ [m.s <sup>-1</sup> ] | $\mathcal{U}(-50000, 50000)$ | $-28.3 \pm 1.9$ |
| Night #51 offset $\Delta\gamma_{51}$ [m.s <sup>-1</sup> ] | $\mathcal{U}(-50000, 50000)$ | $-28.8 \pm 1.9$ |

Notes:

- $\mathcal{U}(a, b)$ : uniform distribution between  $a$  and  $b$

Supplementary Table 6: **List of parameters used in the analysis using the GP-correction model (model 2) for stellar activity.** The respective priors are provided together with the posteriors for both the Dartmouth and PARSEC stellar evolution tracks. The posterior values represent the median and 68.3% credible interval. Fixed and derived values that might be useful for follow-up work are also reported.

| Parameter                                                 | Prior                        | Dartmouth<br>(adopted)            | Posterior                         |
|-----------------------------------------------------------|------------------------------|-----------------------------------|-----------------------------------|
| <i>Stellar Parameters</i>                                 |                              |                                   |                                   |
| Effective temperature $T_{\text{eff}}$ [K]                | $\mathcal{N}(5120, 39)$      | $5185 \pm 32$                     | $5185 \pm 31$                     |
| Surface gravity $\log g$ [cgs]                            | $\mathcal{N}(4.51, 0.12)$    | $4.567^{+0.031}_{-0.046}$         | $4.582^{+0.027}_{-0.041}$         |
| Iron abundance [Fe/H] [dex]                               | $\mathcal{N}(-0.063, 0.022)$ | $-0.065 \pm 0.022$                | $-0.064 \pm 0.022$                |
| Distance to Earth $D$ [pc]                                | $\mathcal{P}(2, 10, 1000)$   | $104 \pm 4$                       | $100 \pm 3$                       |
| Interstellar extinction $E(B - V)$ [mag]                  | $\mathcal{U}(0, 1)$          | $0.0064^{+0.0093}_{-0.0047}$      | $0.0063^{+0.0095}_{-0.0045}$      |
| Systemic radial velocity $\gamma$ [km.s <sup>-1</sup> ]   | $\mathcal{U}(15, 30)$        | $22.981 \pm 0.004$                | $22.981 \pm 0.004$                |
| Linear limb-darkening coefficient $u_a$                   | (derived)                    | $0.5168 \pm 0.0082$               | $0.5169 \pm 0.0079$               |
| Quadratic limb-darkening coefficient $u_b$                | (derived)                    | $0.1898 \pm 0.0059$               | $0.1897 \pm 0.0056$               |
| Stellar density $\rho_{\star}/\rho_{\odot}$               | (derived)                    | $1.68^{+0.17}_{-0.23}$            | $1.83^{+0.16}_{-0.21}$            |
| Stellar mass $M_{\star}$ [ $M_{\odot}$ ]                  | (derived)                    | $0.837^{+0.019}_{-0.025}$         | $0.807 \pm 0.023$                 |
| Stellar radius $R_{\star}$ [ $R_{\odot}$ ]                | (derived)                    | $0.793^{+0.032}_{-0.020}$         | $0.762^{+0.025}_{-0.016}$         |
| Stellar age $\tau$ [Gyr]                                  | (derived)                    | $5.4^{+5.2}_{-3.7}$               | $5.7^{+5.2}_{-3.9}$               |
| <i>Planet b Parameters</i>                                |                              |                                   |                                   |
| Orbital Period $P_b$ [d]                                  | $\mathcal{N}(0.58425, 0.01)$ | $0.584249 \pm 1.4 \times 10^{-5}$ | $0.584250 \pm 1.5 \times 10^{-5}$ |
| Transit epoch $T_{0,b}$ [BJD - 2457000]                   | $\mathcal{N}(586.9746, 0.1)$ | $586.9750 \pm 1.0 \times 10^{-3}$ | $586.9750 \pm 1.0 \times 10^{-3}$ |
| Radial velocity semi-amplitude $K_b$ [m.s <sup>-1</sup> ] | $\mathcal{U}(0, 10^2)$       | $2.23 \pm 0.35$                   | $2.23 \pm 0.36$                   |
| Orbital inclination $i_b$ [°]                             | $\mathcal{S}(70, 90)$        | $84.0^{+2.8}_{-2.2}$              | $85.7 \pm 2.7$                    |
| Planet-to-star radius ratio $k_b$                         | $\mathcal{U}(0, 1)$          | $0.01345 \pm 0.00033$             | $0.01336 \pm 0.00029$             |
| Orbital eccentricity $e_b$                                | (fixed)                      | 0                                 | 0                                 |
| System scale $a_b/R_{\star}$                              | (derived)                    | $3.50^{+0.11}_{-0.17}$            | $3.60^{+0.10}_{-0.17}$            |
| Impact parameter $b_b$                                    | (derived)                    | $0.37^{+0.11}_{-0.16}$            | $0.27^{+0.14}_{-0.17}$            |
| Transit duration $T_{14,b}$ [h]                           | (derived)                    | $1.21^{+0.03}_{-0.04}$            | $1.21 \pm 0.03$                   |
| Continued on next page                                    |                              |                                   |                                   |

**Supplementary Table 6 – continued from previous page**

| Parameter                                                             | Prior                         |                                   | Posterior                         |                                   |
|-----------------------------------------------------------------------|-------------------------------|-----------------------------------|-----------------------------------|-----------------------------------|
|                                                                       | Dartmouth                     | PARSEC                            | Dartmouth                         | PARSEC                            |
| Planet mass $M_b$ [ $M_\oplus$ ]                                      | (derived)                     | $2.59 \pm 0.43$                   | $2.59 \pm 0.43$                   | $2.54 \pm 0.41$                   |
| Planet radius $R_b$ [ $R_\oplus$ ]                                    | (derived)                     | $1.165^{+0.066}_{-0.048}$         | $1.165^{+0.066}_{-0.048}$         | $1.109^{+0.055}_{-0.033}$         |
| Planet bulk density $\rho_b$ [ $\text{g}\cdot\text{cm}^{-3}$ ]        | (derived)                     | $8.9 \pm 2.1$                     | $8.9 \pm 2.1$                     | $10.0 \pm 2.1$                    |
| <i>Planet c Parameters</i>                                            |                               |                                   |                                   |                                   |
| Orbital Period $P_c$ [d]                                              | $\mathcal{N}(8.3274, 0.01)$   | $8.32835 \pm 4.5 \times 10^{-4}$  | $8.32835 \pm 4.5 \times 10^{-4}$  | $8.32835 \pm 4.5 \times 10^{-4}$  |
| Transit epoch $T_{0,c}$ [BJD - 2457000]                               | $\mathcal{N}(536.3766, 0.1)$  | $536.3647 \pm 4.3 \times 10^{-3}$ | $536.3647 \pm 4.2 \times 10^{-3}$ | $536.3647 \pm 4.2 \times 10^{-3}$ |
| Radial velocity semi-amplitude $K_c$ [ $\text{m}\cdot\text{s}^{-1}$ ] | $\mathcal{U}(0, 100)$         | $3.2^{+2.3}_{-1.9}$               | $3.2^{+2.2}_{-1.9}$               | $3.2^{+2.2}_{-1.9}$               |
| Orbital inclination $i_c$ [°]                                         | $\mathcal{S}(70, 90)$         | $87.94^{+0.13}_{-0.18}$           | $87.94^{+0.13}_{-0.18}$           | $88.05^{+0.12}_{-0.16}$           |
| Planet-to-star radius ratio $k_c$                                     | $\mathcal{U}(0, 1)$           | $0.02452 \pm 0.00051$             | $0.02452 \pm 0.00051$             | $0.02432 \pm 0.00051$             |
| Orbital eccentricity $e_c$                                            | (fixed)                       | 0                                 | 0                                 | 0                                 |
| System scale $a_c/R_\star$                                            | (derived)                     | $20.56^{+0.67}_{-0.97}$           | $20.56^{+0.67}_{-0.97}$           | $21.14^{+0.59}_{-0.86}$           |
| Impact parameter $b_c$                                                | (derived)                     | $0.74 \pm 0.03$                   | $0.74 \pm 0.03$                   | $0.72 \pm 0.03$                   |
| Transit duration $T_{14,c}$ [h]                                       | (derived)                     | $2.20 \pm 0.06$                   | $2.20 \pm 0.06$                   | $2.20 \pm 0.06$                   |
| Planet mass $M_c$ [ $M_\oplus$ ]                                      | (derived)                     | $8.88^{+6.6}_{-5.2}$              | $8.88^{+6.6}_{-5.2}$              | $8.88^{+6.1}_{-5.1}$              |
| Planet radius $R_c$ [ $R_\oplus$ ]                                    | (derived)                     | $2.12^{+0.11}_{-0.08}$            | $2.12^{+0.11}_{-0.08}$            | $2.02^{+0.09}_{-0.07}$            |
| Planet bulk density $\rho_c$ [ $\text{g}\cdot\text{cm}^{-3}$ ]        | (derived)                     | $4.9^{+4.1}_{-2.9}$               | $4.9^{+4.1}_{-2.9}$               | $5.7^{+4.3}_{-3.3}$               |
| <i>Planet d Parameters</i>                                            |                               |                                   |                                   |                                   |
| Orbital Period $P_d$ [d]                                              | $\mathcal{U}(20, 40)$         | $31.0 \pm 1.1$                    | $31.0 \pm 1.1$                    | $31.0 \pm 1.0$                    |
| Transit epoch $T_{0,d}$ [BJD - 2457000]                               | $\mathcal{U}(623.00, 623.13)$ | $623.0641^{+0.0025}_{-0.0034}$    | $623.0641^{+0.0024}_{-0.0035}$    | $623.0641^{+0.0024}_{-0.0035}$    |
| Radial velocity semi-amplitude $K_d$ [ $\text{m}\cdot\text{s}^{-1}$ ] | $\mathcal{U}(0, 1000)$        | $2.3^{+2.5}_{-1.6}$               | $2.3^{+2.5}_{-1.6}$               | $2.1^{+2.1}_{-1.4}$               |
| Orbital inclination $i_d$ [°]                                         | $\mathcal{S}(70, 90)$         | $88.93^{+0.18}_{-0.24}$           | $88.93^{+0.18}_{-0.24}$           | $88.99^{+0.13}_{-0.18}$           |
| Planet-to-star radius ratio $k_d$                                     | $\mathcal{U}(0, 1)$           | $0.0305 \pm 0.0026$               | $0.0305 \pm 0.0026$               | $0.0312^{+0.0022}_{-0.0029}$      |
| Orbital eccentricity $e_d$                                            | $\beta(0.867, 3.03)$          | $0.39^{+0.25}_{-0.30}$            | $0.39^{+0.25}_{-0.30}$            | $0.30^{+0.29}_{-0.23}$            |
| Argument of periastron $\omega_d$ [°]                                 | $\mathcal{U}(0, 360)$         | $102^{+92}_{-68}$                 | $102^{+92}_{-68}$                 | $120^{+130}_{-80}$                |
| System scale $a_d/R_\star$                                            | (derived)                     | $49.3 \pm 2.3$                    | $49.3 \pm 2.3$                    | $50.7^{+1.8}_{-2.0}$              |
| Impact parameter $b_d$                                                | (derived)                     | $0.74^{+0.12}_{-0.40}$            | $0.74^{+0.12}_{-0.40}$            | $0.79^{+0.08}_{-0.36}$            |
| Transit duration $T_{14,d}$ [h]                                       | (derived)                     | $2.65^{+0.15}_{-0.20}$            | $2.65^{+0.15}_{-0.20}$            | $2.67^{+0.15}_{-0.21}$            |
| Planet mass $M_d$ [ $M_\oplus$ ]                                      | (derived)                     | $9.2^{+8.8}_{-6.4}$               | $9.2^{+8.8}_{-6.4}$               | $8.1^{+7.9}_{-5.5}$               |
| Continued on next page                                                |                               |                                   |                                   |                                   |

**Supplementary Table 6 – continued from previous page**

| Parameter                                                      | Prior                                       |        | Posterior                          |                                    |
|----------------------------------------------------------------|---------------------------------------------|--------|------------------------------------|------------------------------------|
|                                                                | Dartmouth                                   | PARSEC | Dartmouth                          | PARSEC                             |
| Planet radius $R_d$ [ $R_\oplus$ ]                             | (derived)                                   |        | $2.65 \pm 0.24$                    | $2.59^{+0.21}_{-0.24}$             |
| Planet bulk density $\rho_d$ [ $\text{g}\cdot\text{cm}^{-3}$ ] | (derived)                                   |        | $2.6^{+3.1}_{-1.8}$                | $2.6^{+2.9}_{-1.8}$                |
| <i>Gaussian Process Hyperparameters</i>                        |                                             |        |                                    |                                    |
| $A$ [ $\text{m}\cdot\text{s}^{-1}$ ]                           | $\mathcal{U}(0, 100)$                       |        | $12.3^{+2.5}_{-1.8}$               | $12.2^{+2.5}_{-1.8}$               |
| $\lambda_1$ [d]                                                | $\mathcal{U}(0, 1000)$                      |        | $16.7 \pm 2.5$                     | $16.7 \pm 2.4$                     |
| $\lambda_2$                                                    | $\mathcal{U}(0, 1000)$                      |        | $0.71 \pm 0.12$                    | $0.70 \pm 0.12$                    |
| $P_{\text{rot}}$ [d]                                           | $\mathcal{N}(18.1, 0.3)$                    |        | $18.2 \pm 0.3$                     | $18.2 \pm 0.3$                     |
| <i>Instrument-related Parameters</i>                           |                                             |        |                                    |                                    |
| HARPS jitter [ $\text{m}\cdot\text{s}^{-1}$ ]                  | $\mathcal{U}(0, 10^2)$                      |        | $0.93^{+0.41}_{-0.49}$             | $0.91^{+0.40}_{-0.49}$             |
| K2 contamination [%]                                           | $\mathcal{N}_{\mathcal{U}}(0, 0.5, 0, 100)$ |        | $0.35^{+0.37}_{-0.24}$             | $0.34^{+0.37}_{-0.24}$             |
| K2 jitter [ppm]                                                | $\mathcal{U}(0, 10^5)$                      |        | $64 \pm 1$                         | $64 \pm 1$                         |
| K2 out-of-transit flux                                         | $\mathcal{U}(0.99, 1.01)$                   |        | $0.9999999 \pm 1.3 \times 10^{-6}$ | $0.9999999 \pm 1.4 \times 10^{-6}$ |
| SED jitter [mag]                                               | $\mathcal{U}(0, 0.1)$                       |        | $0.043^{+0.026}_{-0.018}$          | $0.044^{+0.025}_{-0.019}$          |

Notes:

- $\mathcal{N}(\mu, \sigma^2)$ : normal distribution with mean  $\mu$  and width  $\sigma^2$
- $\mathcal{U}(a, b)$ : uniform distribution between  $a$  and  $b$
- $\mathcal{N}_{\mathcal{U}}(\mu, \sigma^2, a, b)$ : normal distribution with mean  $\mu$  and width  $\sigma^2$  multiplied with a uniform distribution between  $a$  and  $b$
- $\mathcal{S}(a, b)$ : sine distribution between  $a$  and  $b$
- $\beta(a, b)$ : Beta distribution with parameters  $a$  and  $b$
- $\mathcal{P}(n, a, b)$ : power-law distribution of exponent  $n$  between  $a$  and  $b$

Supplementary Table 7: **List of parameters used in the analysis using the diagnoses-decorrelation correction model (model 3) for stellar activity.** The respective priors and posteriors are provided. Here, only the Dartmouth stellar evolution tracks were used.

| Parameter                                                  | Prior                          | Posterior                         |
|------------------------------------------------------------|--------------------------------|-----------------------------------|
| <i>Stellar Parameters</i>                                  |                                |                                   |
| Effective temperature $T_{\text{eff}}$ [K]                 | $\mathcal{N}(5120, 39)$        | $5184 \pm 44$                     |
| Surface gravity $\log g$ [cgs]                             | $\mathcal{N}(4.51, 0.12)$      | $4.548^{+0.038}_{-0.047}$         |
| Iron abundance [Fe/H] [dex]                                | $\mathcal{N}(-0.063, 0.022)$   | $-0.066 \pm 0.022$                |
| Distance to Earth $D$ [pc]                                 | $\mathcal{P}(2, 10, 1000)$     | $104 \pm 5$                       |
| Interstellar extinction $E(B - V)$ [mag]                   | $\mathcal{U}(0, 1)$            | $0.007^{+0.010}_{-0.005}$         |
| Systemic radial velocity $\gamma$ [km.s <sup>-1</sup> ]    | $\mathcal{U}(15, 30)$          | $22.969^{+0.022}_{-0.020}$        |
| <i>Planet b Parameters</i>                                 |                                |                                   |
| Orbital Period $P_b$ [d]                                   | $\mathcal{N}(0.58425, 0.01)$   | $0.584250 \pm 1.6 \times 10^{-5}$ |
| Transit epoch $T_{0,b}$ [BJD - 2457000]                    | $\mathcal{N}(586.9746, 0.1)$   | $586.9749 \pm 1.1 \times 10^{-3}$ |
| Radial velocity semi-amplitude $K_b$ [m.s <sup>-1</sup> ]  | $\mathcal{U}(0, 10^2)$         | $2.12 \pm 0.75$                   |
| Orbital inclination $i_b$ [°]                              | $\mathcal{S}(70, 90)$          | $83.4 \pm 2.3$                    |
| Planet-to-star radius ratio $k_b$                          | $\mathcal{U}(0, 1)$            | $0.01353^{+0.00034}_{-0.0030}$    |
| Orbital eccentricity $e_b$                                 | (fixed)                        | 0                                 |
| <i>Planet c Parameters</i>                                 |                                |                                   |
| Orbital Period $P_c$ [d]                                   | $\mathcal{N}(8.3274, 0.01)$    | $8.32842 \pm 4.8 \times 10^{-4}$  |
| Transit epoch $T_{0,c}$ [BJD - 2457000]                    | $\mathcal{N}(536.3766, 0.1)$   | $536.3640 \pm 4.8 \times 10^{-3}$ |
| Radial velocity semi-amplitude $K_c$ [cm.s <sup>-1</sup> ] | $\mathcal{U}(0, 10^4)$         | $331 \pm 80$                      |
| Orbital inclination $i_c$ [°]                              | $\mathcal{S}(70, 90)$          | $87.89^{+0.16}_{-0.19}$           |
| Planet-to-star radius ratio $k_c$                          | $\mathcal{U}(0, 1)$            | $0.02459 \pm 0.00056$             |
| Orbital eccentricity $e_c$                                 | (fixed)                        | 0                                 |
| <i>Planet d Parameters</i>                                 |                                |                                   |
| Orbital Period $P_d$ [d]                                   | $\mathcal{U}(20, 40)$          | $30.95 \pm 0.67$                  |
| Transit epoch $T_{0,d}$ [BJD - 2457000]                    | $\mathcal{U}(623.00, 623.13)$  | $623.0641^{+0.0026}_{-0.0035}$    |
| Radial velocity semi-amplitude $K_d$ [cm.s <sup>-1</sup> ] | $\mathcal{U}(0, 1000)$         | $108^{+140}_{-77}$                |
| Orbital inclination $i_d$ [°]                              | $\mathcal{S}(70, 90)$          | $88.92^{+0.26}_{-0.31}$           |
| Planet-to-star radius ratio $k_d$                          | $\mathcal{U}(0, 1)$            | $0.0297^{+0.0033}_{-0.0019}$      |
| Orbital eccentricity $e_d$                                 | $\beta(0.867, 3.03)$           | $0.48^{+0.21}_{-0.36}$            |
| Argument of periastron $\omega_d$ [°]                      | $\mathcal{U}(0, 360)$          | $108^{+69}_{-77}$                 |
| <i>Method parameters</i>                                   |                                |                                   |
| Linear drift $a$ [m.s <sup>-1</sup> .yr <sup>-1</sup> ]    | $\mathcal{U}(-365, 365)$       | $181 \pm 17$                      |
| Quadratic drift $b$ [m.s <sup>-1</sup> .yr <sup>-2</sup> ] | $\mathcal{U}(-133225, 133225)$ | $-89 \pm 97$                      |
| BIS offset $BIS_0$ [km.s <sup>-1</sup> ]                   | $\mathcal{U}(-1, 1)$           | $-0.27^{+0.96}_{-0.63}$           |
| BIS coefficient $c_0$                                      | $\mathcal{U}(-2, 2)$           | $-0.576^{+0.073}_{-0.089}$        |
| FWHM offset $FWHM_0$ [km.s <sup>-1</sup> ]                 | $\mathcal{U}(3, 12)$           | $7.0^{+2.1}_{-2.5}$               |
| FWHM coefficient $c_1$                                     | $\mathcal{U}(-2, 2)$           | $0.204^{+0.034}_{-0.026}$         |
| Continued on next page                                     |                                |                                   |

**Supplementary Table 7 – continued from previous page**

| Parameter                                                       | Prior                                       | Posterior                          |
|-----------------------------------------------------------------|---------------------------------------------|------------------------------------|
| $S_{\text{MW}}$ offset $S_{\text{MW},0}$                        | $\mathcal{U}(0, 5)$                         | $2.7 \pm 1.7$                      |
| $S_{\text{MW}}$ coefficient $c_2$ [ $\text{km}^{-1}.\text{s}$ ] | $\mathcal{U}(-2, 2)$                        | $0.1^{+1.2}_{-1.5}$                |
| $H_\alpha$ offset $I_{H_\alpha,0}$                              | $\mathcal{U}(0, 1)$                         | $0.48 \pm 0.34$                    |
| $H_\alpha$ coefficient $c_3$ [ $\text{km}^{-1}.\text{s}$ ]      | $\mathcal{U}(-2, 2)$                        | $0.1 \pm 1.3$                      |
| Moving average amplitude $\phi$ [ $\text{km}^{-1}.\text{s}$ ]   | $\mathcal{U}(0, 100)$                       | $0.46 \pm 0.20$                    |
| Moving average timescale $\tau$ [d]                             | $\mathcal{J}(0.001, 10000)$                 | $44^{+1900}_{-39}$                 |
| <i>Instrument-related Parameters</i>                            |                                             |                                    |
| HARPS radial velocity jitter [ $\text{m.s}^{-1}$ ]              | $\mathcal{U}(0, 1000)$                      | $5.1^{+0.5}_{-0.4}$                |
| K2 contamination [%]                                            | $\mathcal{N}_{\mathcal{U}}(0, 0.5, 0, 100)$ | $0.33^{+0.38}_{-0.24}$             |
| K2 jitter [ppm]                                                 | $\mathcal{U}(0, 10^5)$                      | $64 \pm 1$                         |
| K2 out-of-transit flux                                          | $\mathcal{U}(0.99, 1.01)$                   | $0.9999999 \pm 1.4 \times 10^{-6}$ |
| SED jitter [mag]                                                | $\mathcal{U}(0, 0.1)$                       | $0.044^{+0.026}_{-0.019}$          |

Notes:

- $\mathcal{N}(\mu, \sigma^2)$ : normal distribution with mean  $\mu$  and width  $\sigma^2$
- $\mathcal{U}(a, b)$ : uniform distribution between  $a$  and  $b$
- $\mathcal{J}(a, b)$ : Jeffreys distribution between  $a$  and  $b$
- $\mathcal{N}_{\mathcal{U}}(\mu, \sigma^2, a, b)$ : normal distribution with mean  $\mu$  and width  $\sigma^2$  multiplied with a uniform distribution between  $a$  and  $b$
- $\mathcal{S}(a, b)$ : sine distribution between  $a$  and  $b$
- $\beta(a, b)$ : Beta distribution with parameters  $a$  and  $b$
- $\mathcal{P}(n, a, b)$ : power-law distribution of exponent  $n$  between  $a$  and  $b$
